# Supplementary material for: Synthesis of Tricyclic Pterolobirin H Analogue: Evaluation of Anticancer and Anti-Inflammatory Activities and Molecular Docking Investigations
Source: MDPI journal article supplement (doi:10.3390/molecules28176208), 2023-08-23
Supplement: s1 [file s1]

# SUPPORTING INFORMATION

## Synthesis of a Tricyclic Pterolobirin H Analogue: Evaluation of Anticancer and Anti-inflammatory Activities and Molecular Docking Investigations

Houda Zentar <sup>1,2</sup>, Fatin Jannus <sup>2</sup>, Marta Medina-O'Donnell <sup>2</sup>, Az-eddine El Mansouri <sup>3</sup>,  
Antonio Fernández <sup>1</sup>,  
José Justicia <sup>1</sup>, Enrique Alvarez-Manzaneda <sup>1</sup>, Fernando J. Reyes-Zurita <sup>2,\*</sup> and Rachid  
Chahboun <sup>1,\*</sup>

<sup>1</sup> Departamento de Química Orgánica, Facultad de Ciencias, Instituto de Biotecnología, Universidad de Granada, 18071 Granada, Spain; zentaruhouda@correo.ugr.es (H.Z.); ajfvargas@ugr.es (A.F.); jjusti@ugr.es (J.J.); eamr@ugr.es (E.A.-M.)

<sup>2</sup> Departamento de Bioquímica y Biología Molecular I, Facultad de Ciencias, Universidad de Granada, 18071 Granada, Spain; fatin@correo.ugr.es (F.J.); mmodonnell@ugr.e (M.M.-O.)

<sup>3</sup> Chemistry Department, University of the Free State, P.O. Box 339, Bloemfontein 9300, South Africa; elmansouri.a@ufs.ac.za

\* Correspondence: ferjes@ugr.es (F.J.R.-Z.); rachid@ugr.es (R.C.); Fax: +34-958-248437 (R.C.)

### Table of contents

|                                                                   |         |
|-------------------------------------------------------------------|---------|
| Figure S1. ....                                                   | S2      |
| Table S1. ....                                                    | S3      |
| Figure S2. ....                                                   | S4      |
| Table S2. ....                                                    | S5      |
| Figure S3. ....                                                   | S6      |
| Figure S4. ....                                                   | S7      |
| <sup>1</sup> H and <sup>13</sup> C NMR spectra of compounds. .... | S8-S19  |
| Infrared spectra of Compounds 12, 13, 14, 15, and 16.....         | S20-S25 |
| HRMS spectra of compounds 12,13, 14, 15, and 16.....              | S26-S30 |

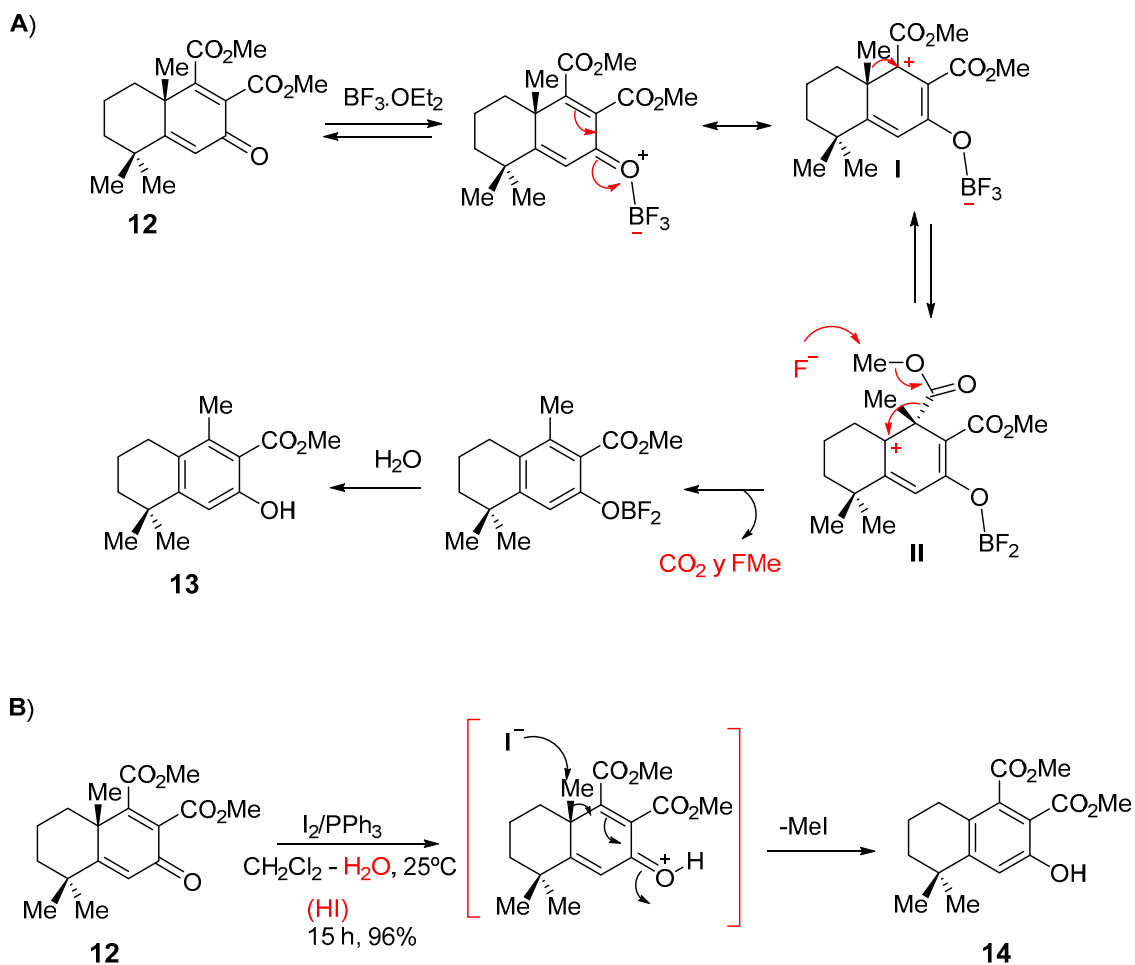

**Figure S1.** Proposed Mechanisms for the obtention of phenols **13** (A) and **14** (B) from dienone **12**.

| Compound                                                                                                                        | Simplified analogue                                                                                                                              |
|---------------------------------------------------------------------------------------------------------------------------------|--------------------------------------------------------------------------------------------------------------------------------------------------|
| 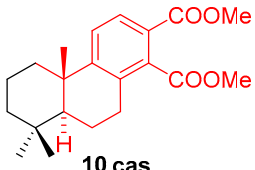 <p><b>10 cas</b></p>                          |  <p><b>10</b></p>                                              |
|  <p><b>11 cas</b></p>                          |  <p><b>11</b></p>                                              |
|  <p><b>12 cas</b></p>                          |  <p><b>12</b></p>                                              |
|  <p><b>13 cas</b></p>                         |  <p><b>13</b></p>                                             |
|  <p><b>14 cas</b></p>                        |  <p><b>14</b></p>                                            |
|  <p><b>15 cas</b></p>                        |  <p><b>15</b></p>                                            |
|  <p><b>16 cas</b><br/>Pterolobirin H (3)</p> |  <p>Simplified analogue<br/>of pterolobirin H -<b>16</b></p> |

**Table S1.** Pterolobirin H (3), its intermediates from our previous report <sup>1</sup> and the simplified analogues.

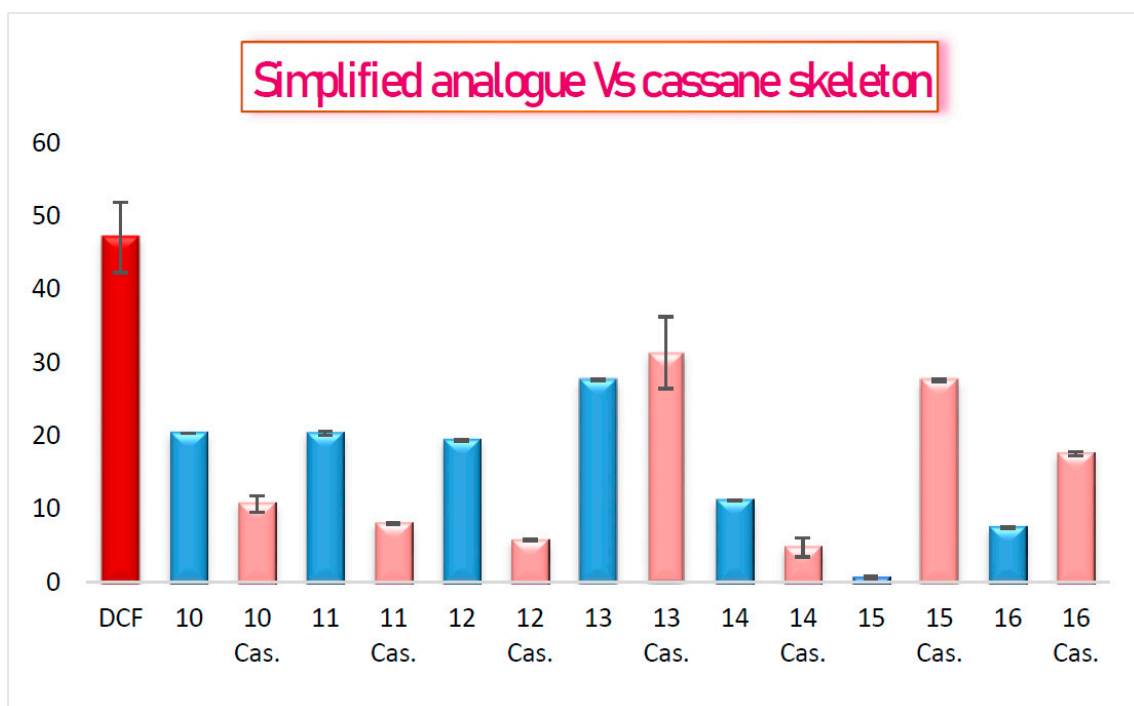

**Figure S2.** NO release-inhibitory effects IC<sub>50</sub> NO (µg/mL) concentrations for DCF, simplified analogues (10-16), and correspondent cassane diterpenoids (10 cas -16 cas/pterolobirin H (3)). The data represent the mean ± SD of at least two independent experiments performed in triplicate.

| <b>Simplified analogue</b> | <b>IC<sub>50</sub>NO (µg/mL)</b> | <b>Cassane skeleton</b>                       | <b>IC<sub>50</sub>NO (µg/mL)</b> |
|----------------------------|----------------------------------|-----------------------------------------------|----------------------------------|
| <b>10</b>                  | 20.37 ± 0.01                     | <b>10 Cas.</b>                                | 10.71 ± 1.14                     |
| <b>11</b>                  | 20.34 ± 0.30                     | <b>11 Cas.</b>                                | 7.98 ± 0.10                      |
| <b>12</b>                  | 19.44 ± 0.12                     | <b>12 Cas.</b>                                | 5.71 ± 0.14                      |
| <b>13</b>                  | 27.60 ± 0.13                     | <b>13 Cas.</b>                                | 31.37 ± 4.90                     |
| <b>14</b>                  | 11.18 ± 0.09                     | <b>14 Cas.</b>                                | 4.74 ± 1.27                      |
| <b>15</b>                  | <b>0.62 ± 8.21</b>               | <b>15 Cas.</b>                                | <b>27.57 ± 0.20</b>              |
| <b>16</b>                  | <b>7.49 ± 0.15</b>               | <b>16 Cas.</b><br><b>(pterolobirin H (3))</b> | <b>17.57 ± 0.31</b>              |

**Table S2.** The IC<sub>50</sub> NO values of cassanes **10 cas–16 cas**, and their simplified analogues **10–16**.

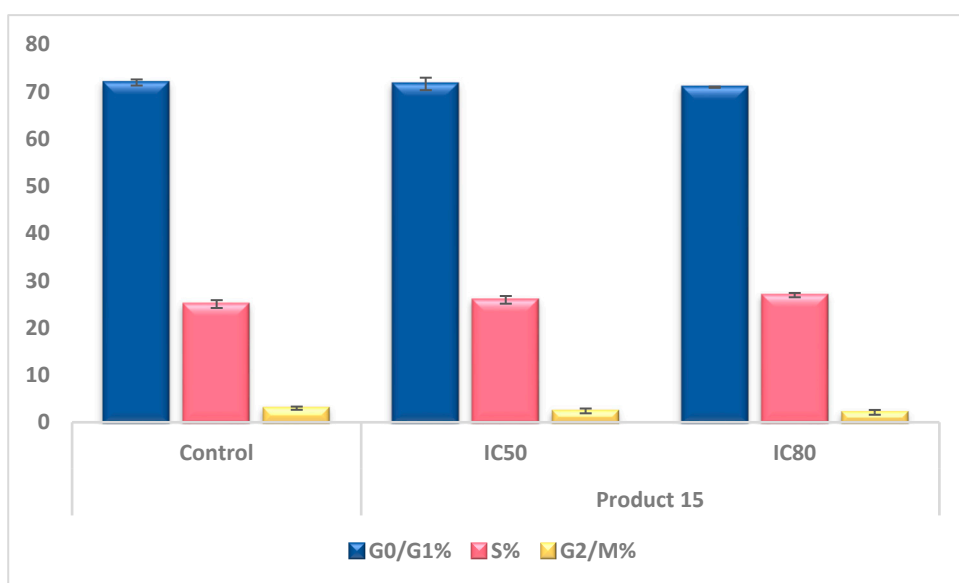

**Figure S3. Top:** Percentages of B16-F10 skin-melanoma cells in each cell-cycle phase, after 72 h treatment with compound **15**, at IC<sub>50</sub> and IC<sub>80</sub> concentrations. G0/G1 phase (Blue), S phase (pink), and G2/M phase (peach). Control (untreated cells); samples (cells treated with compounds **15**). Values represent means  $\pm$  S. D. of at least three independent experiments performed in duplicate.

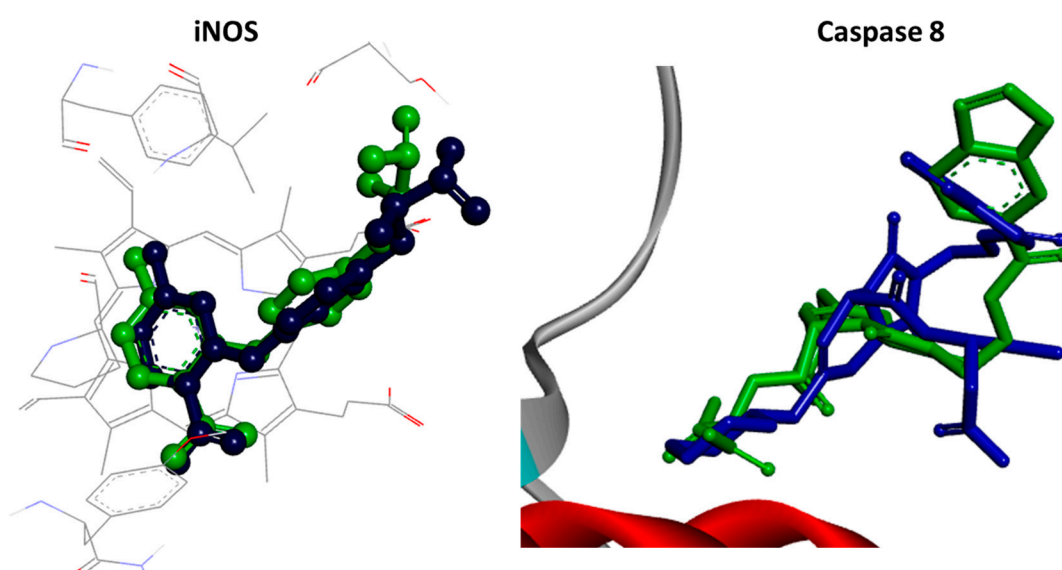

**Figure S4.** Poses of cognate YWO ligand on 4UX6 crystal structure (blue) and redocked (green).

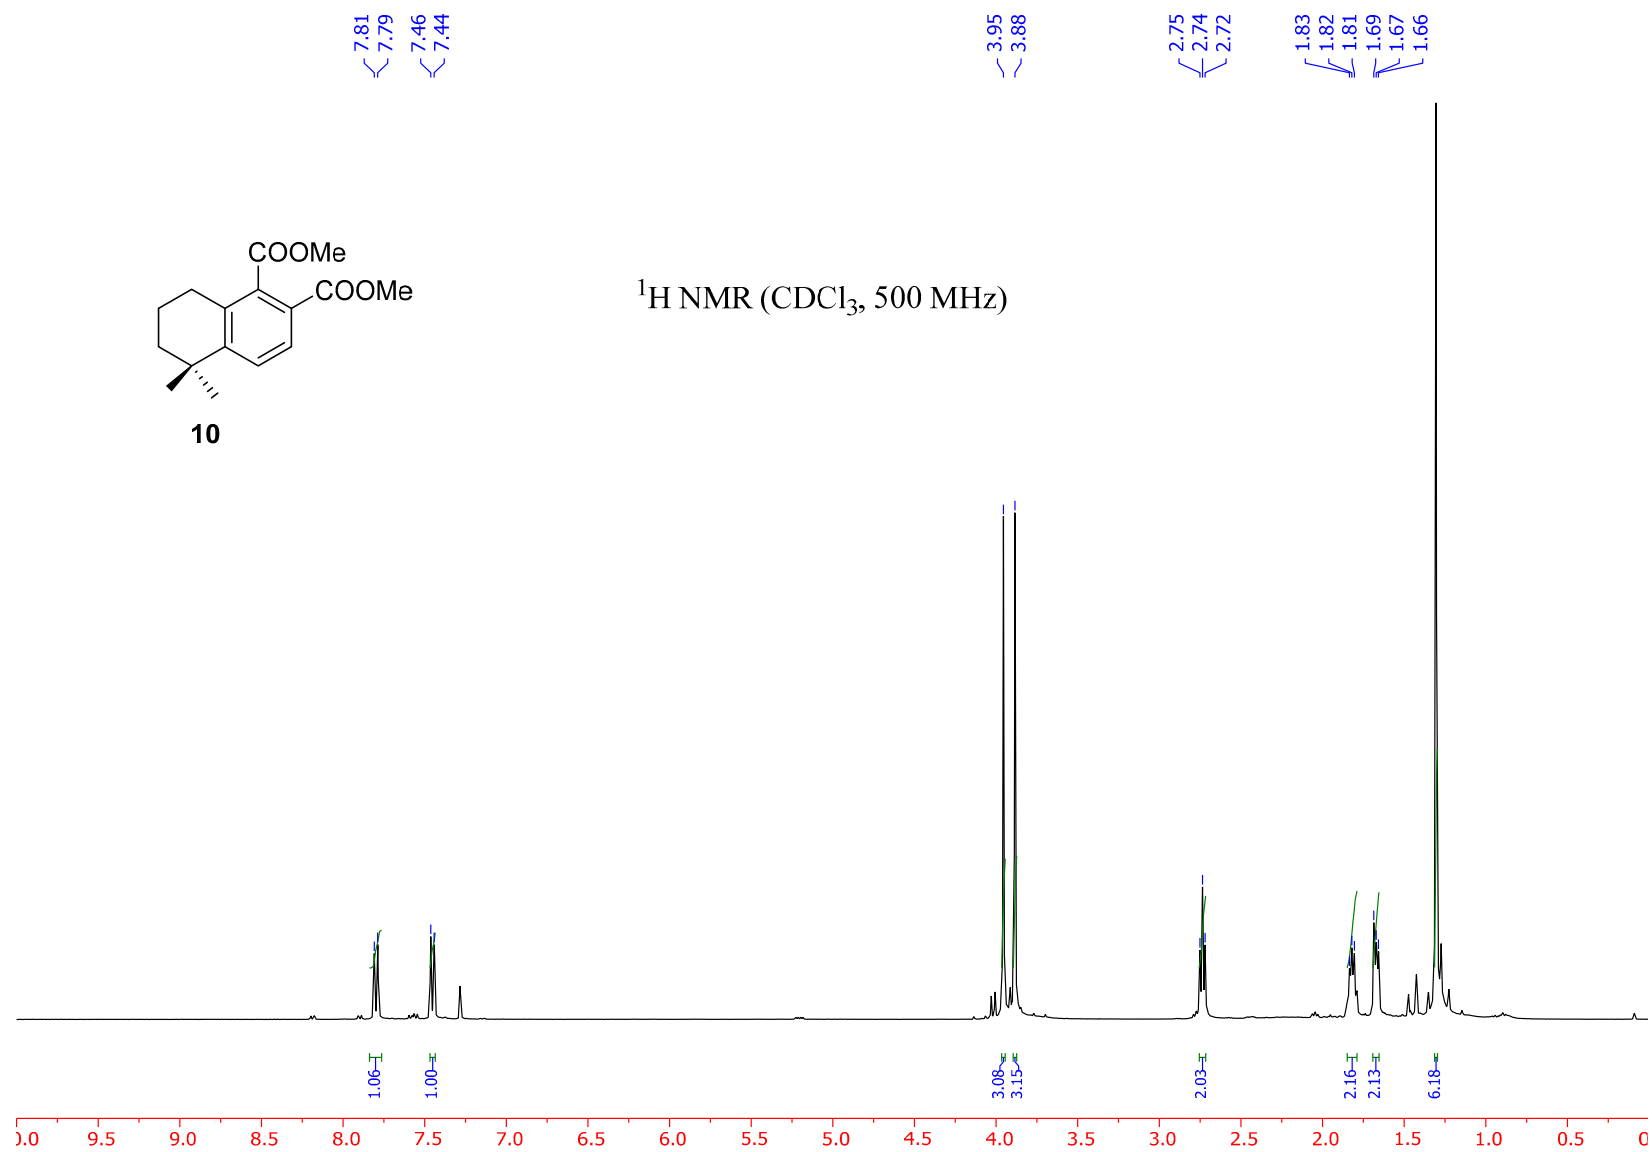



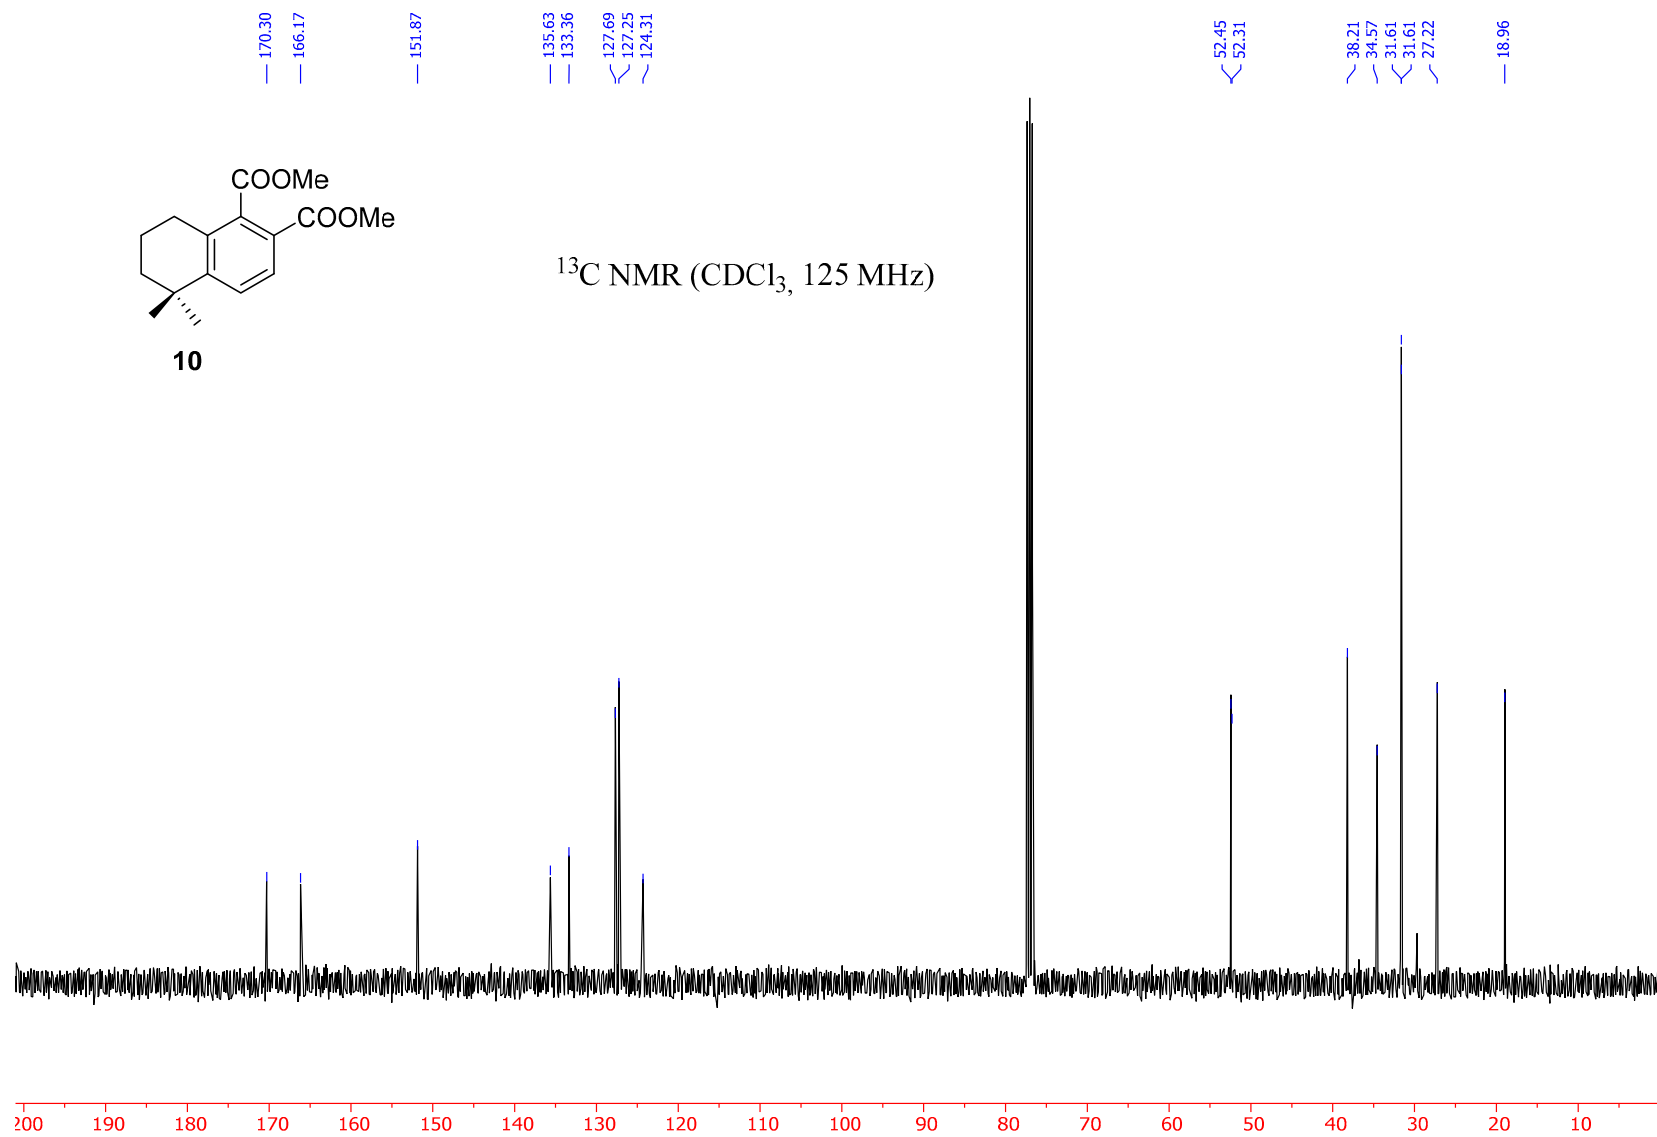

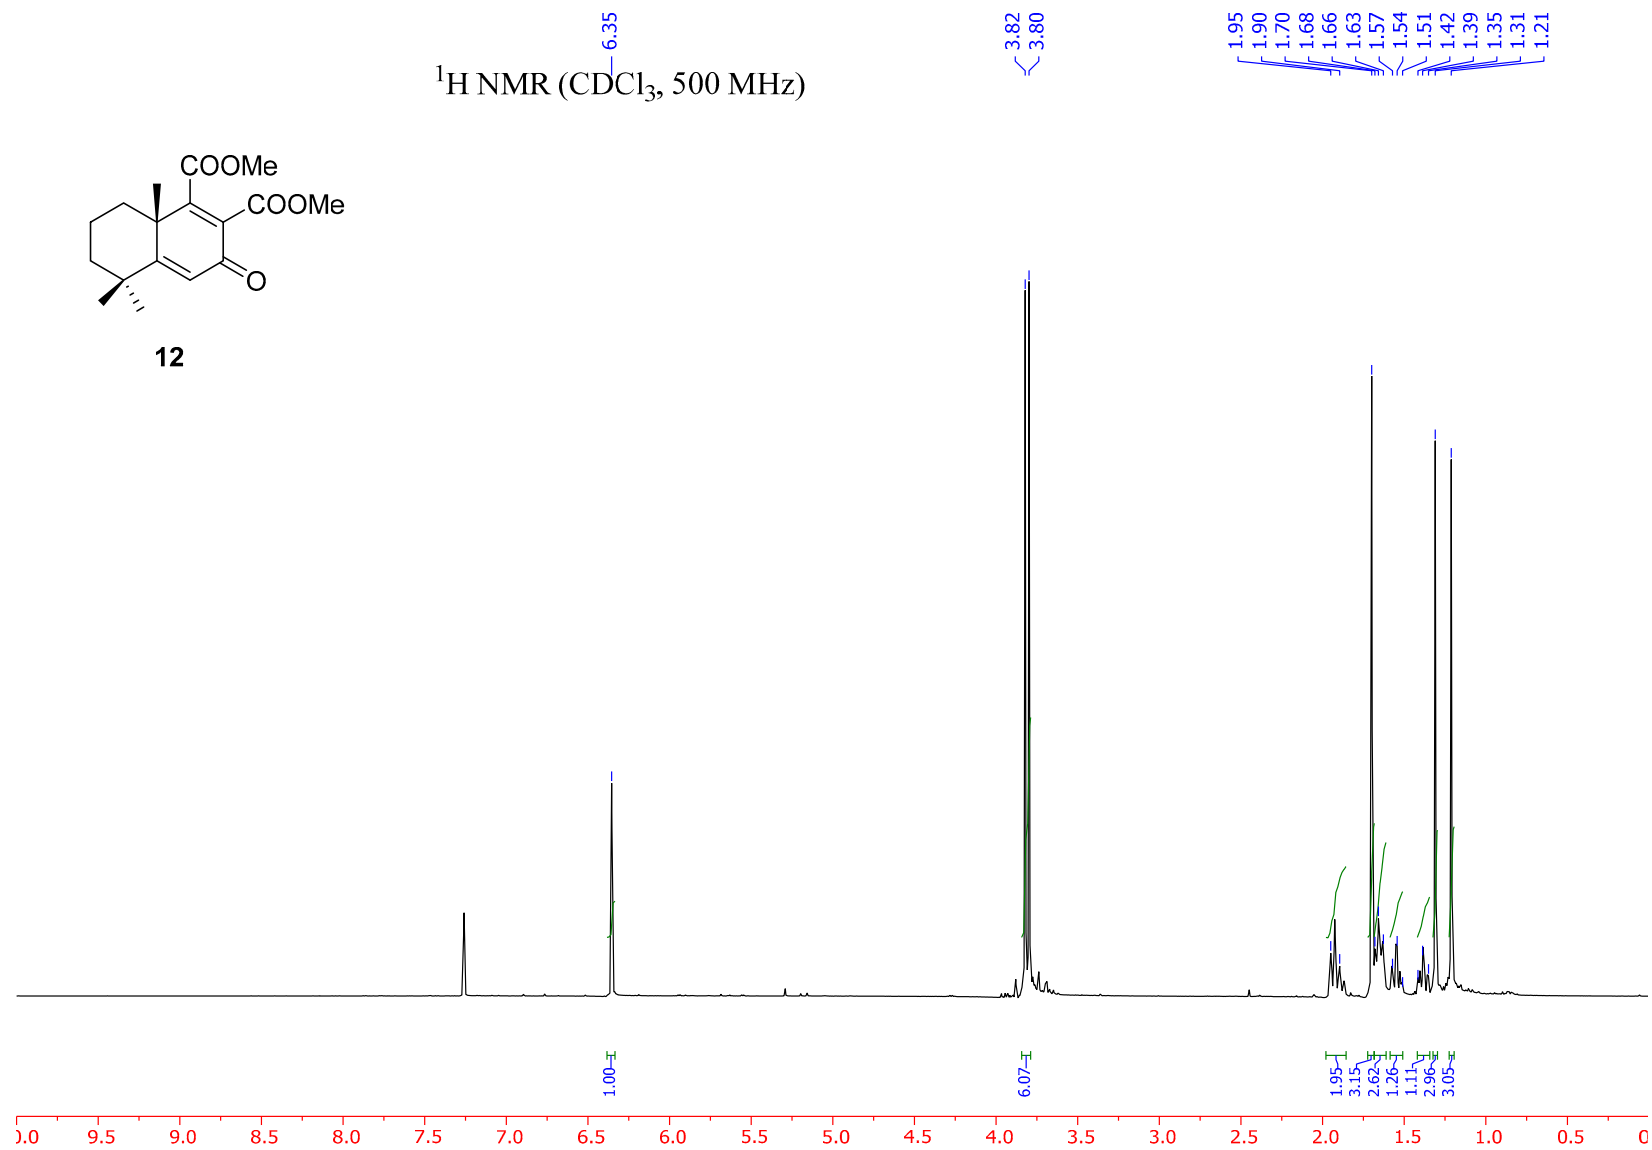

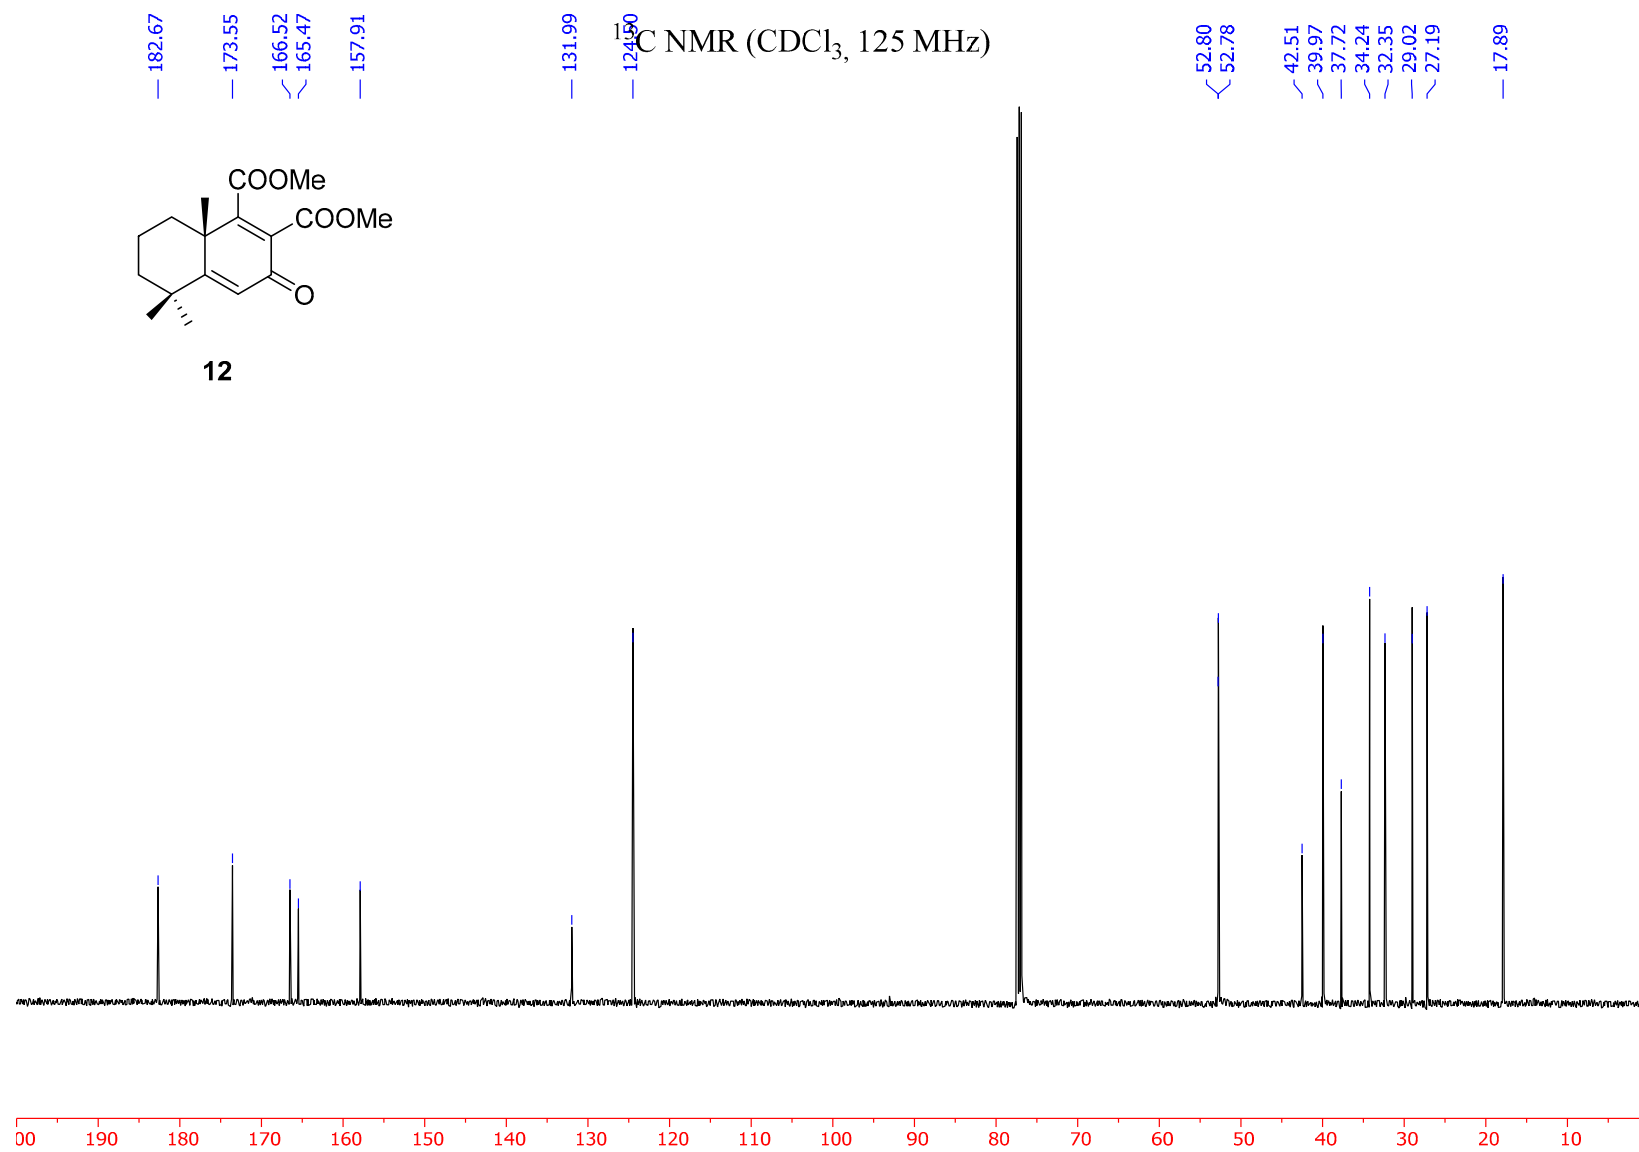

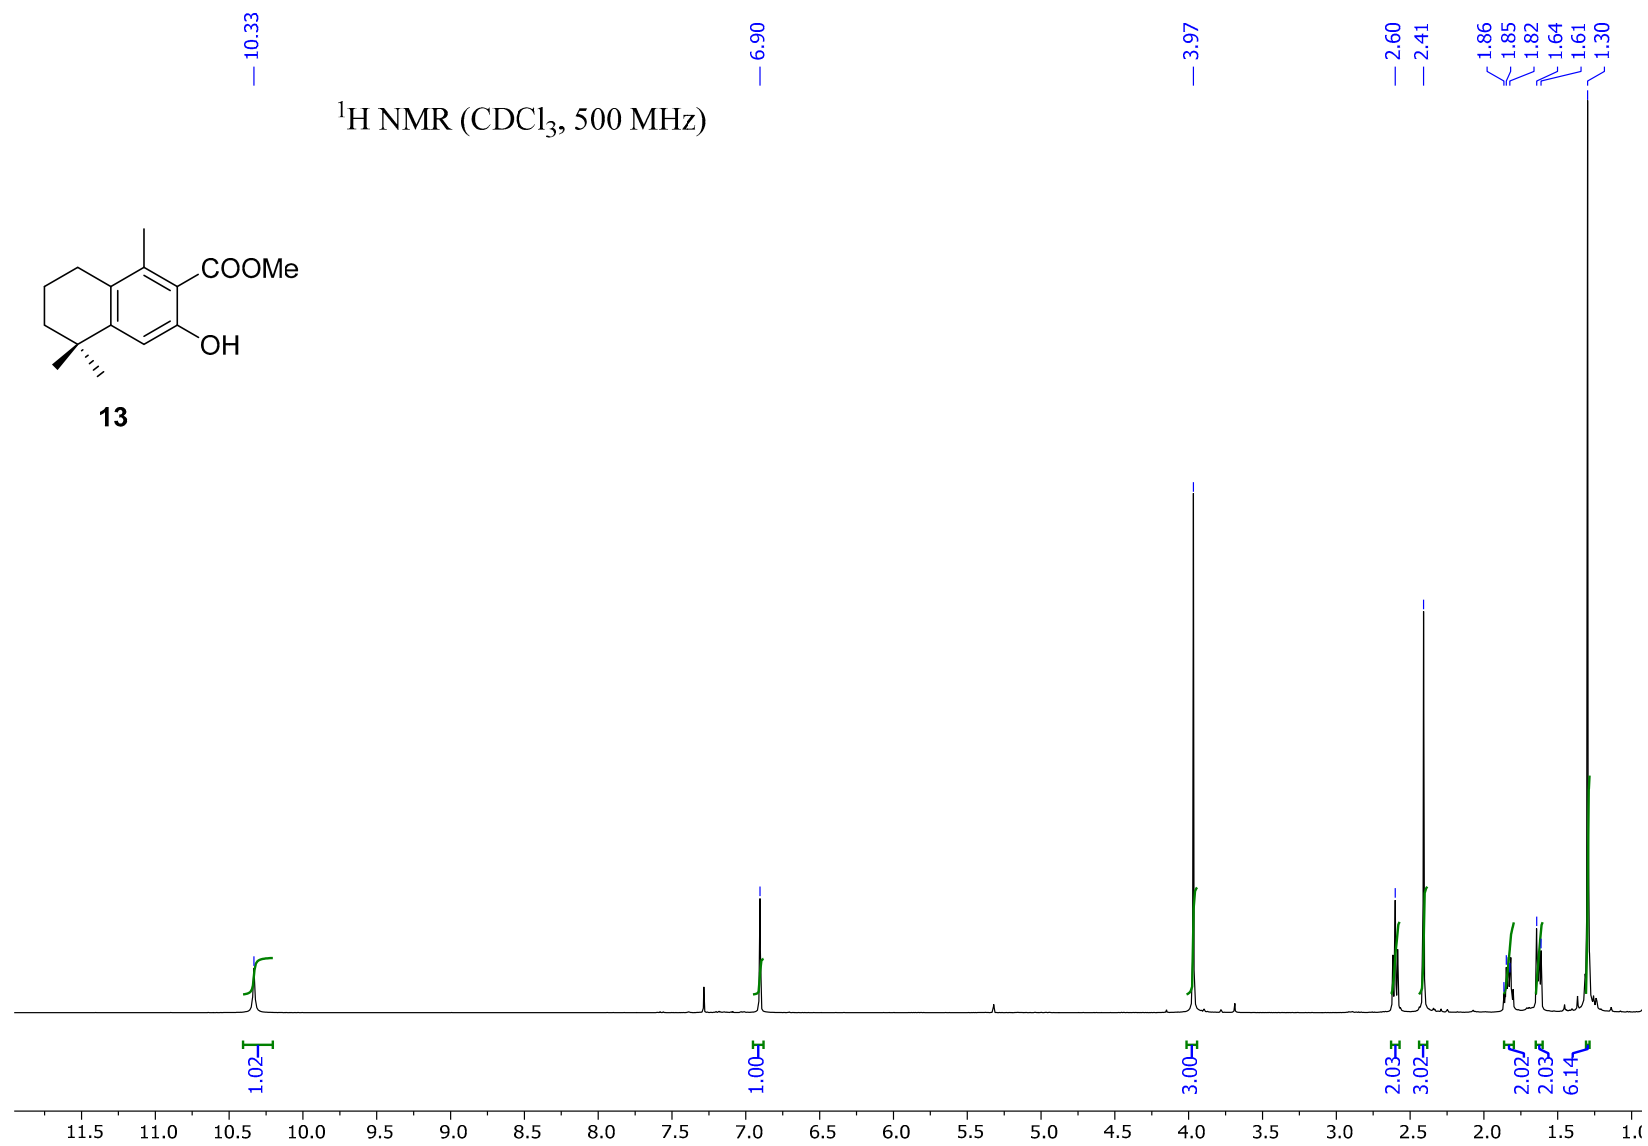

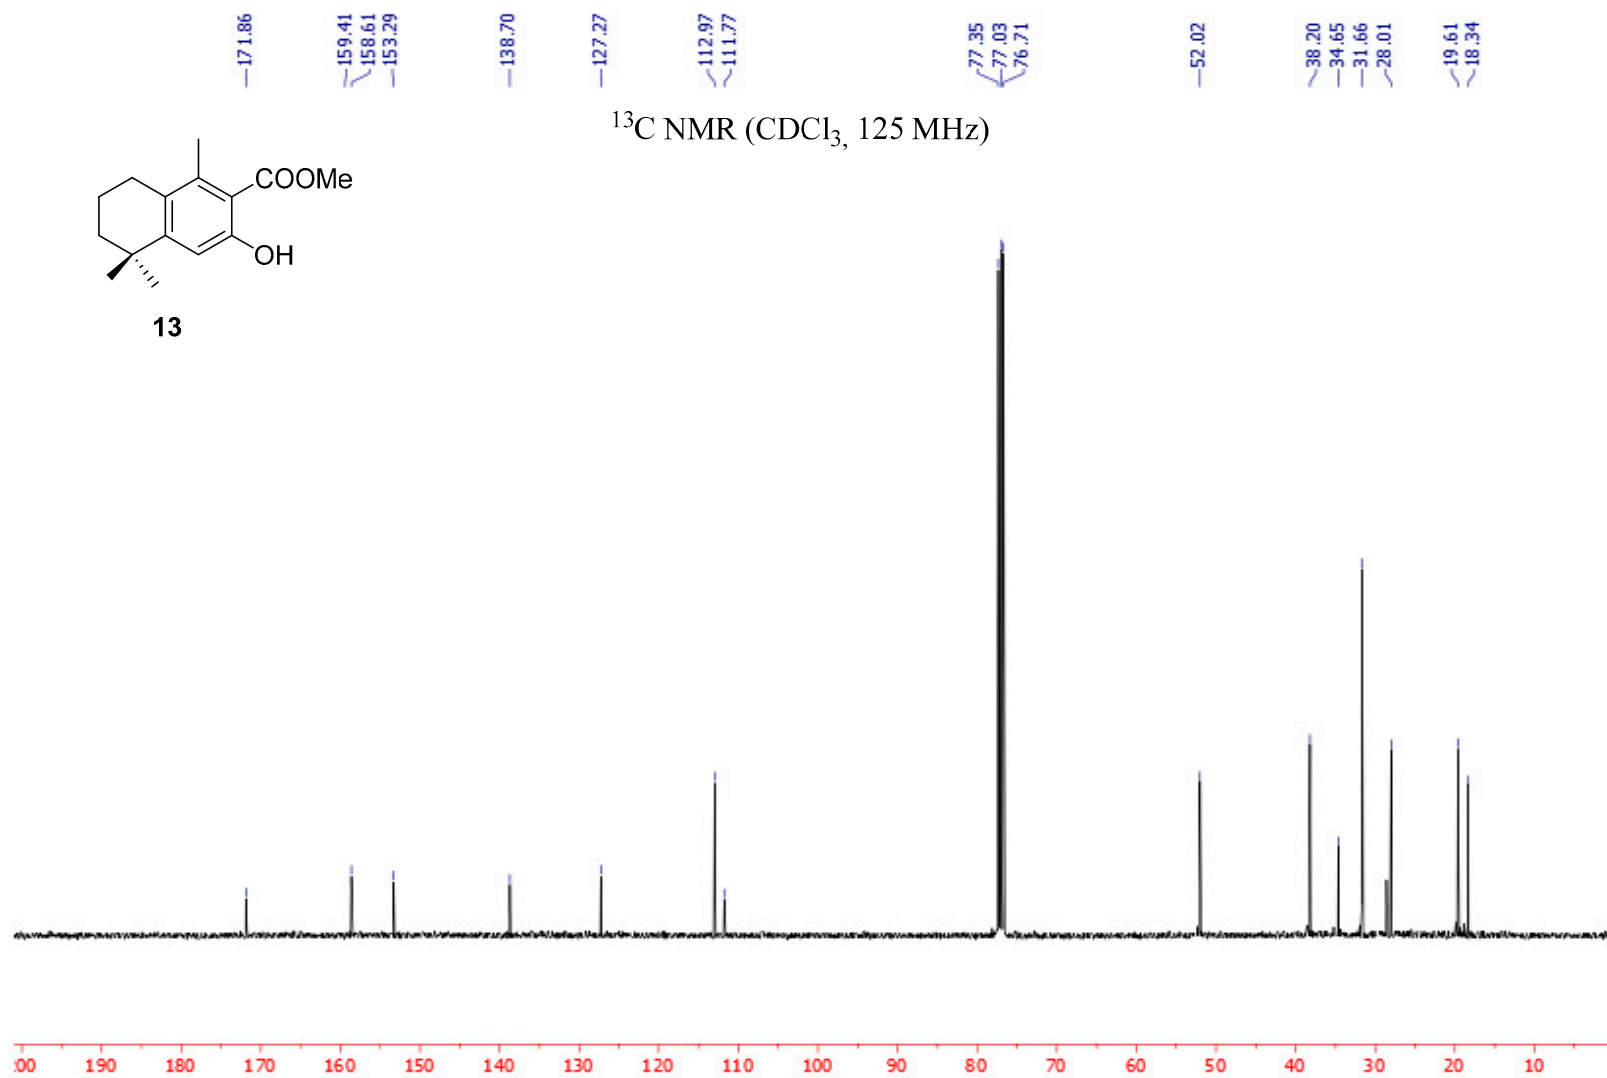

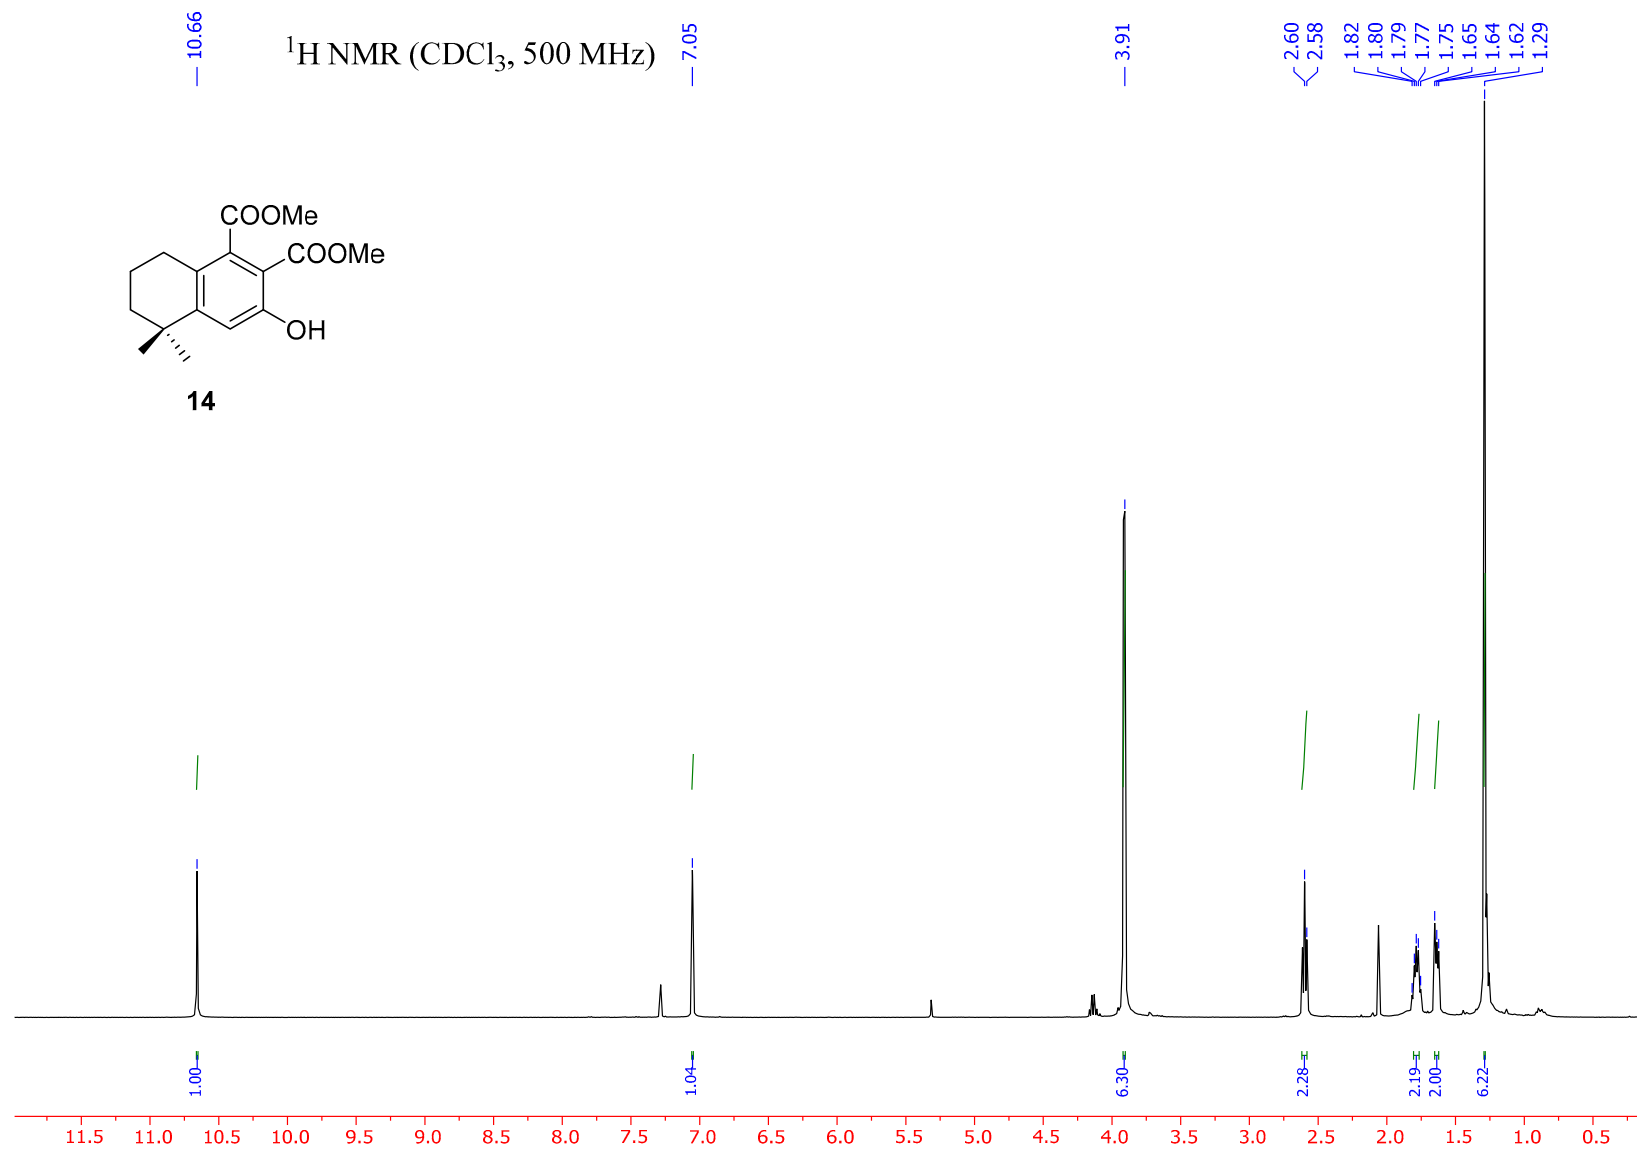

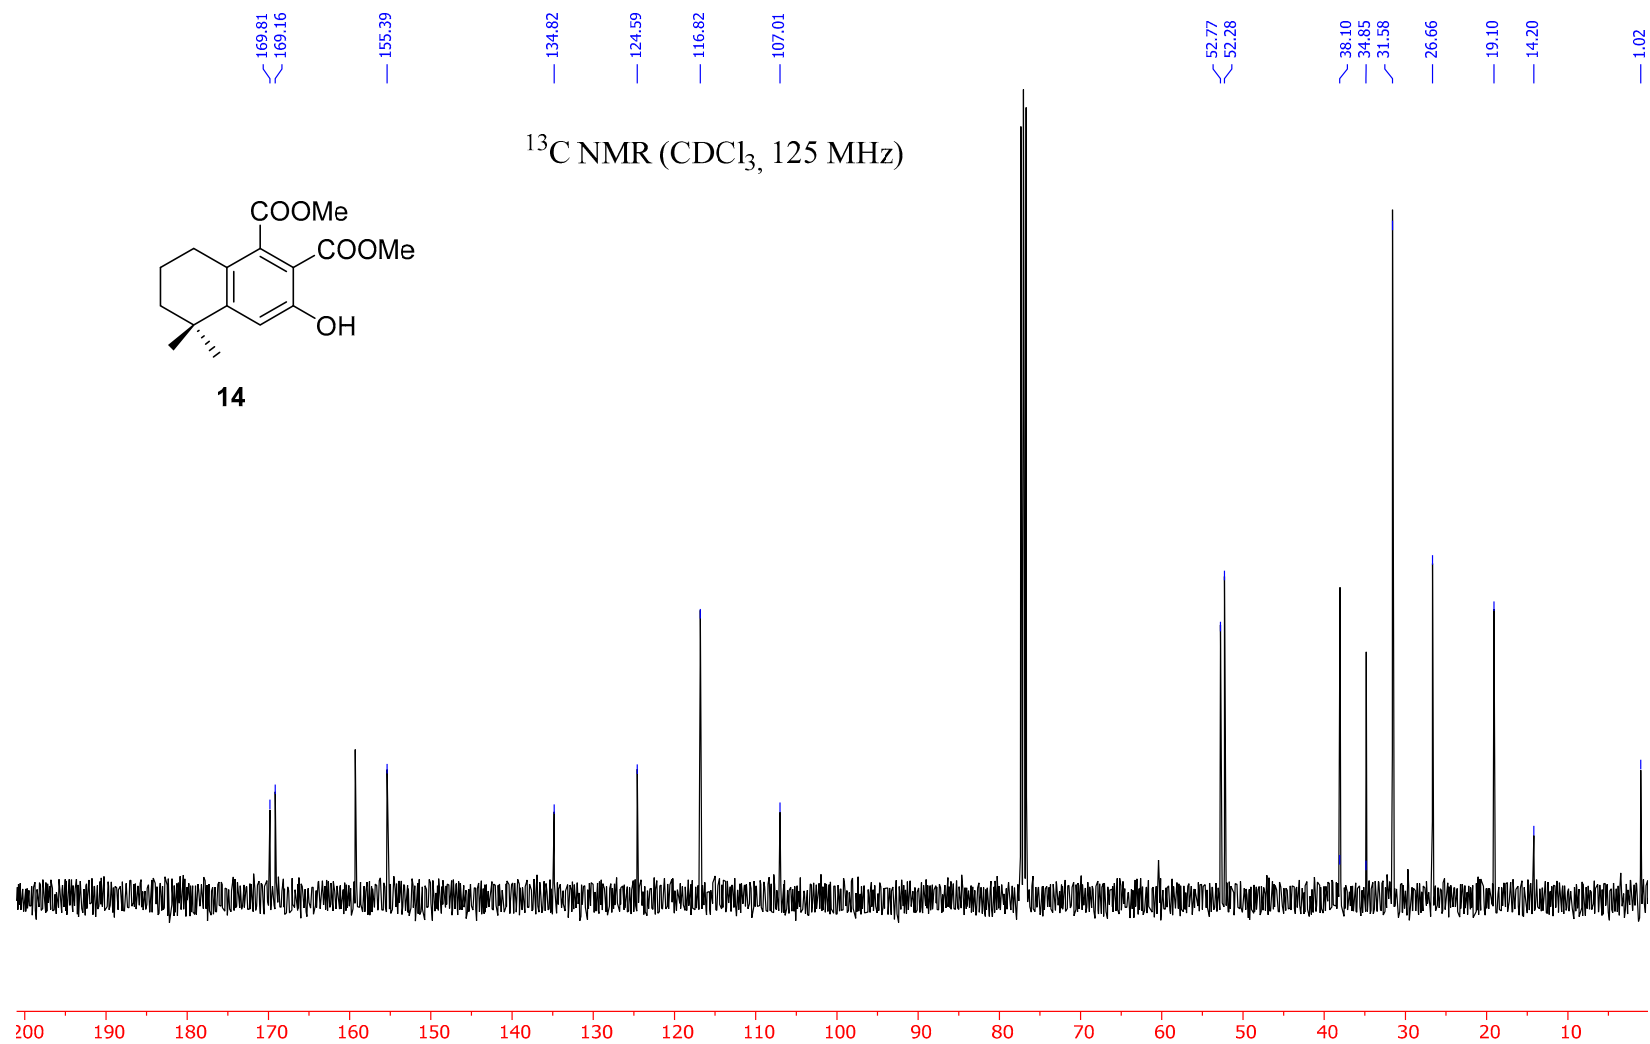

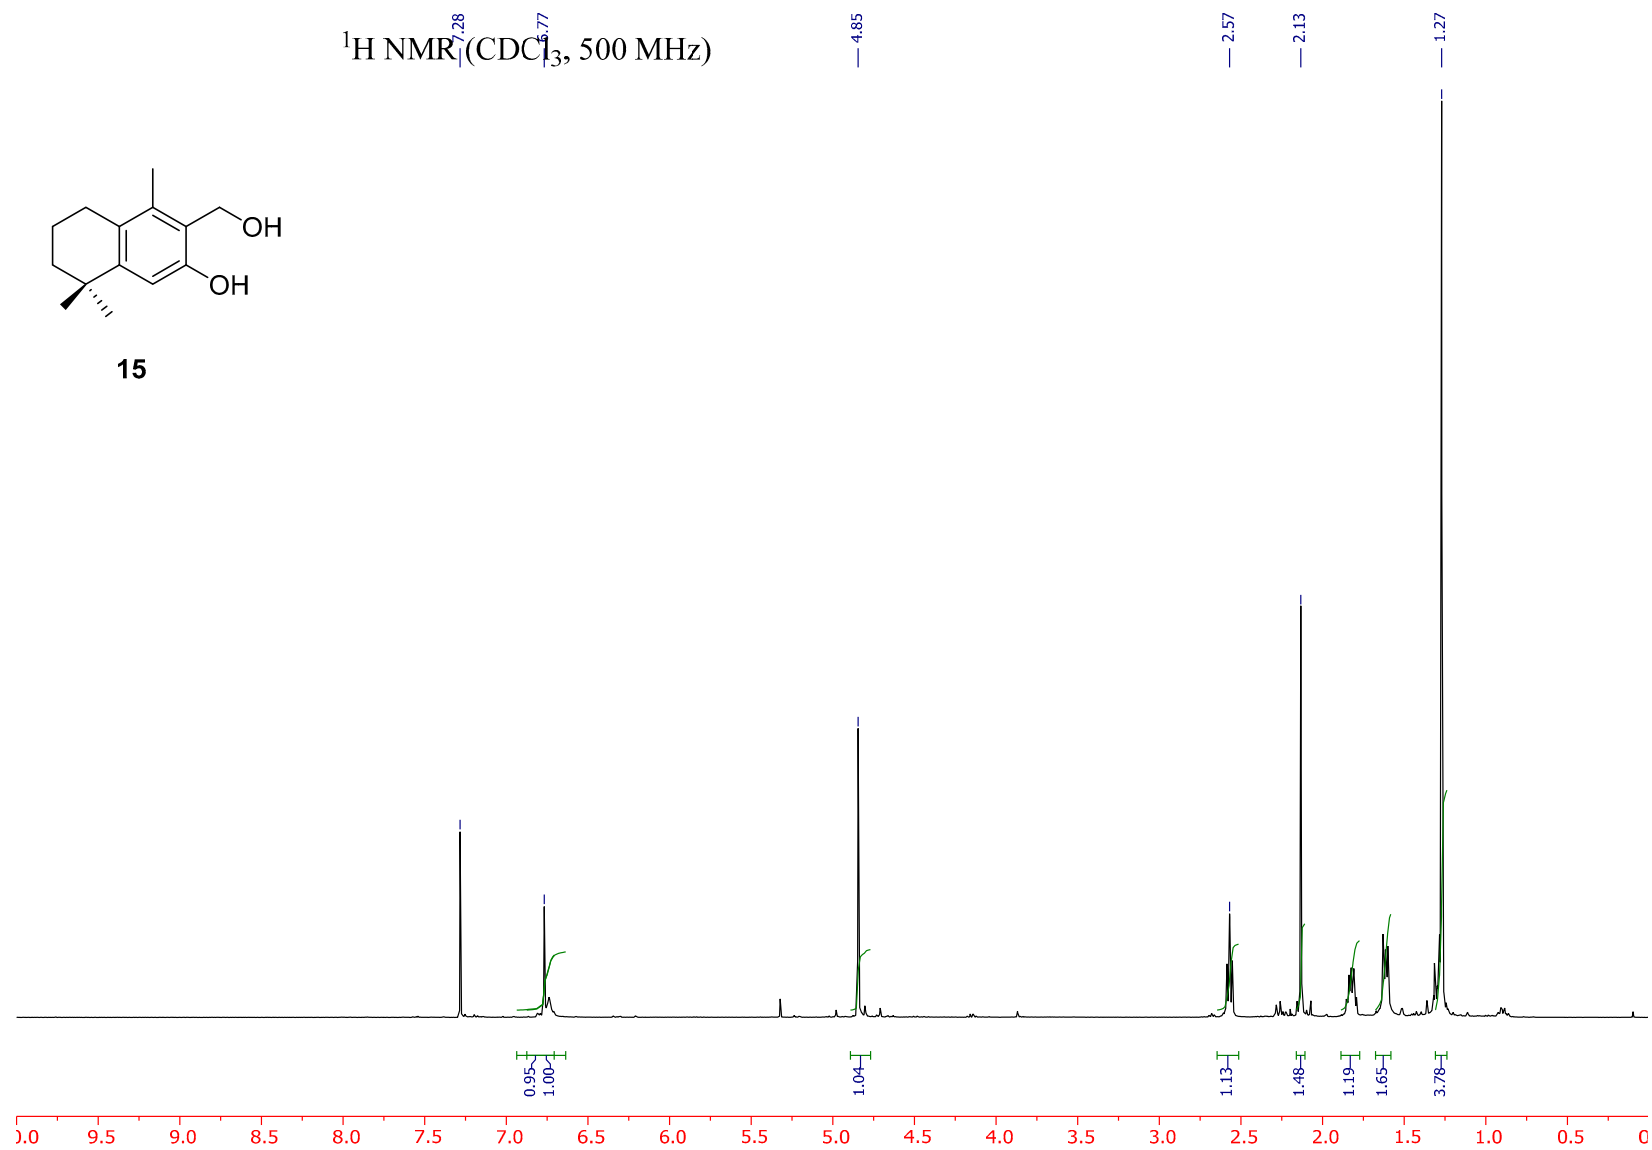



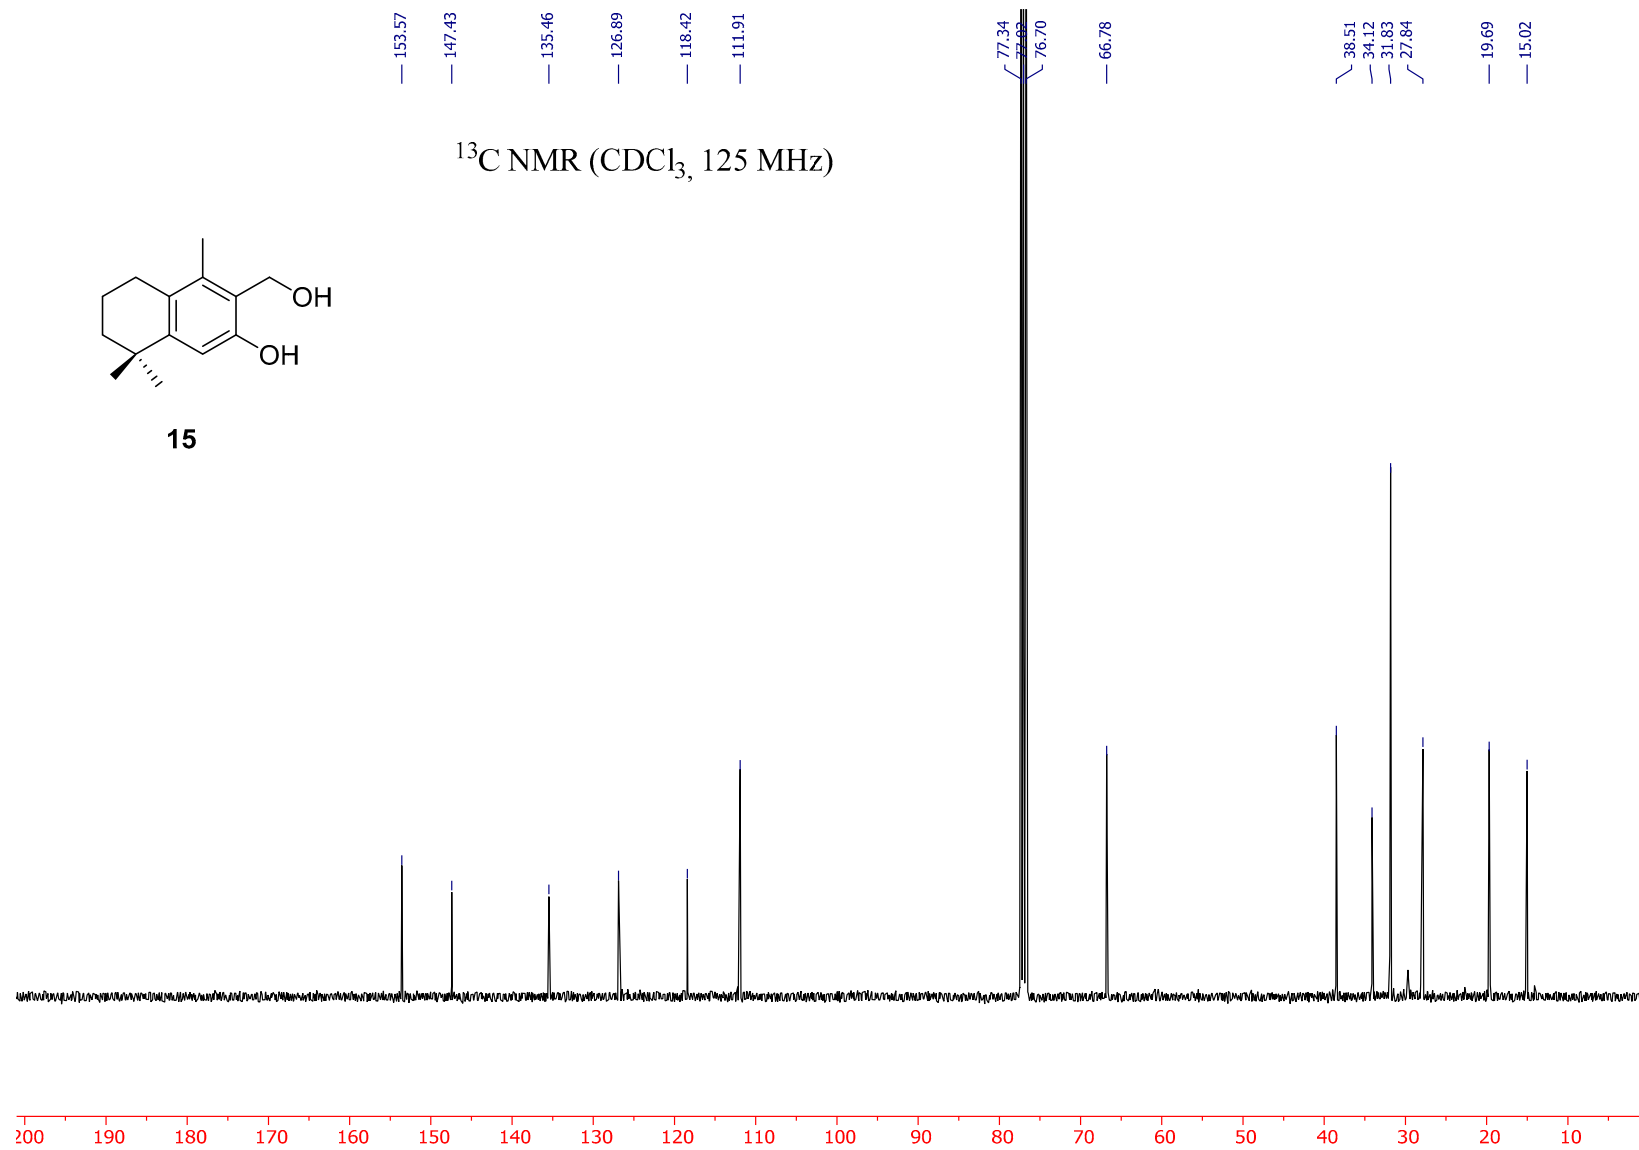

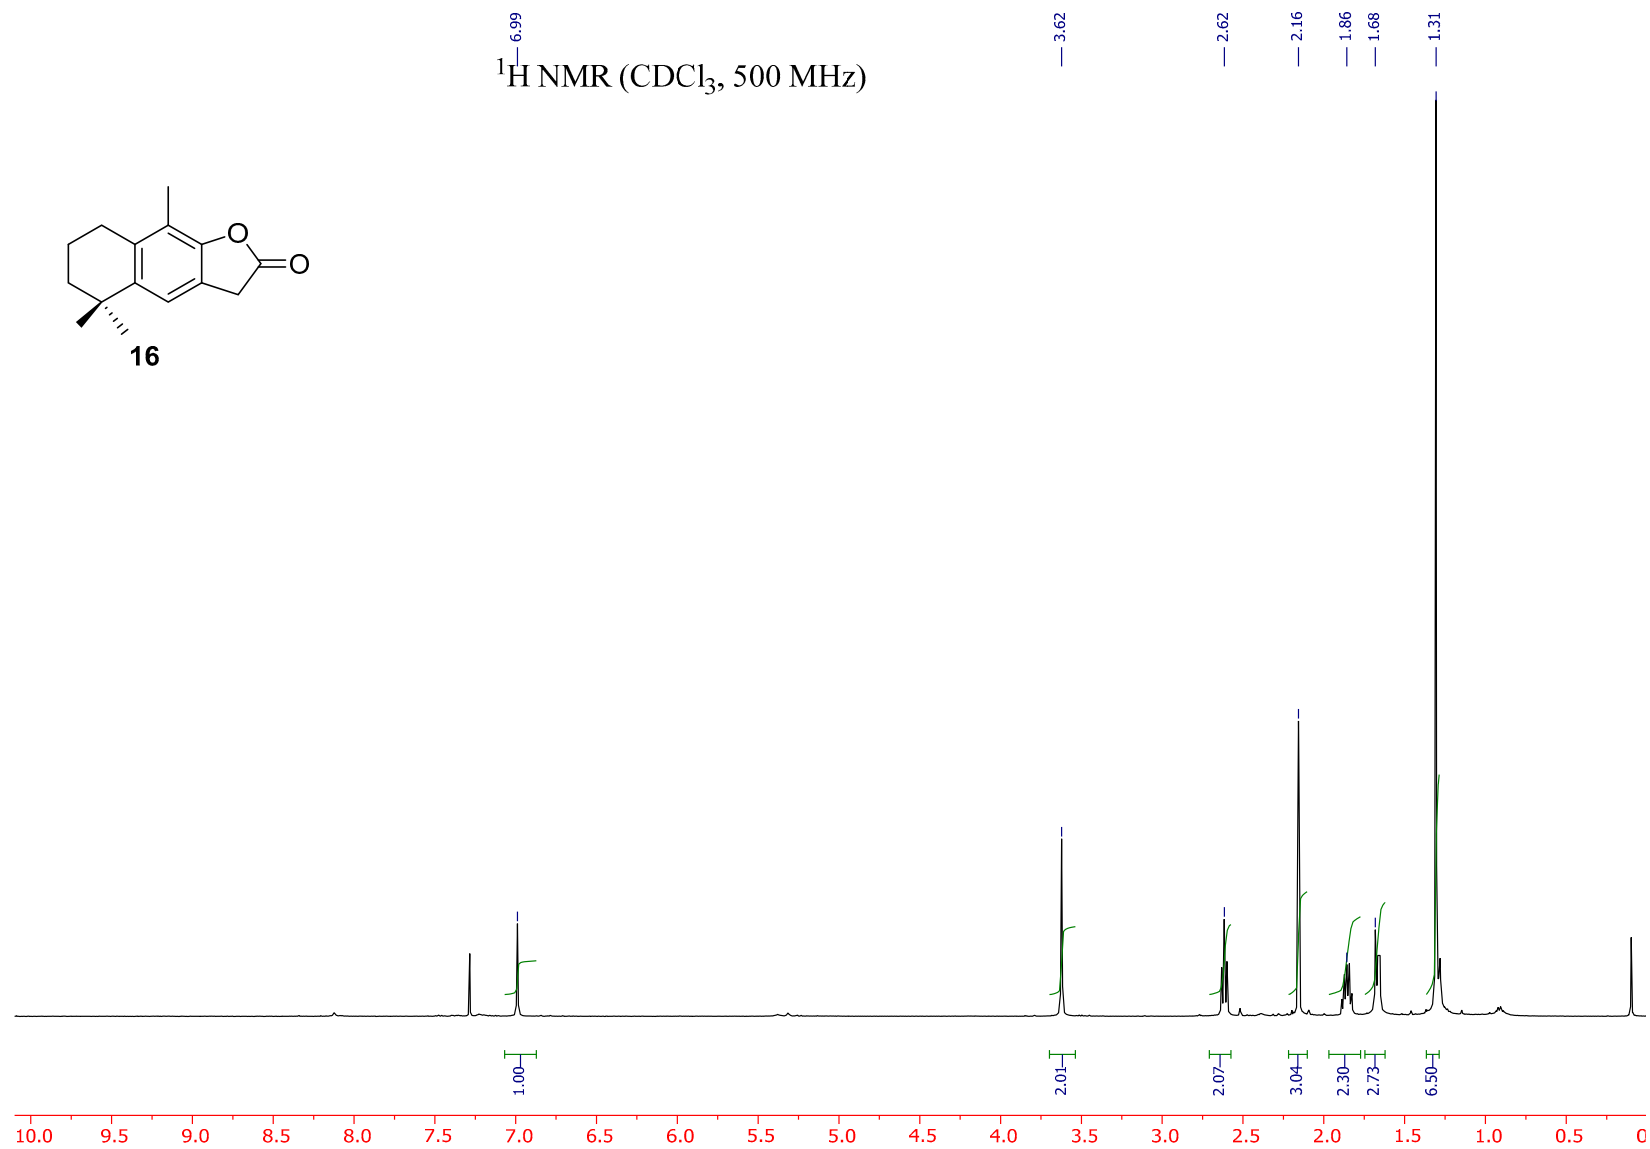

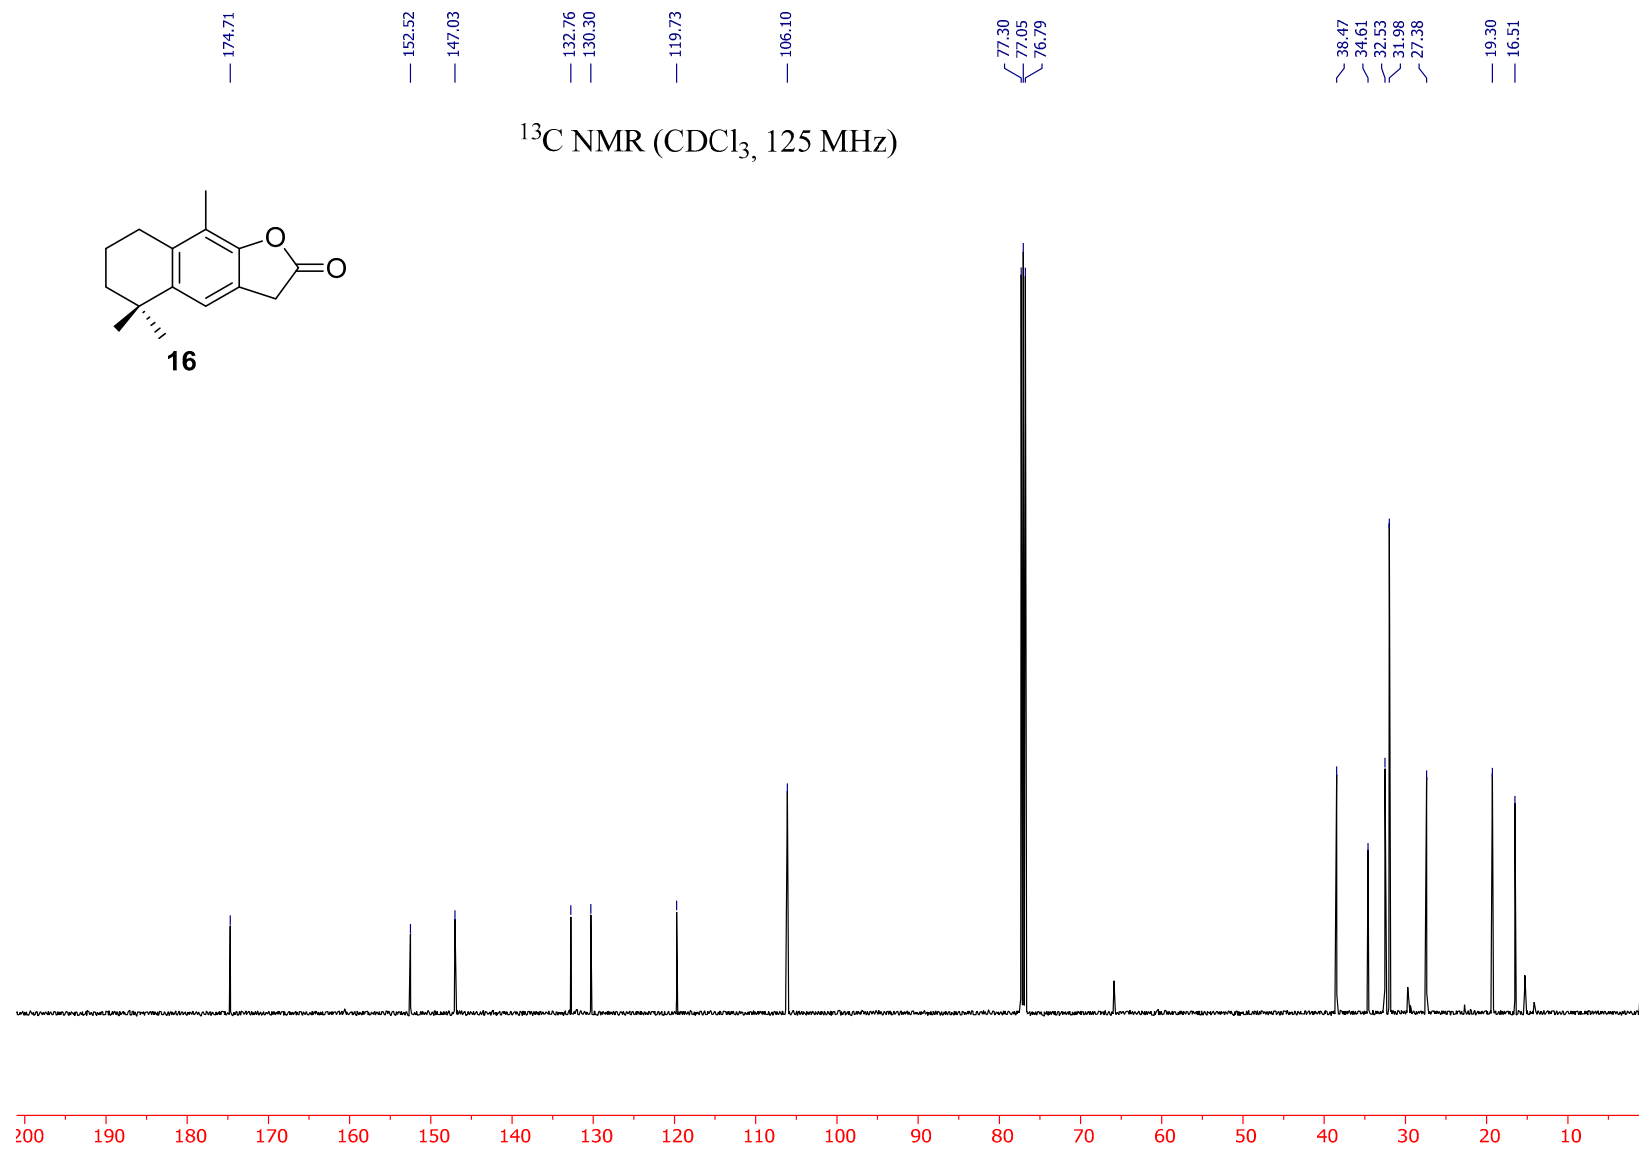

## Infrared spectra of Compounds 10, 12, 13, 14, 15, and 16

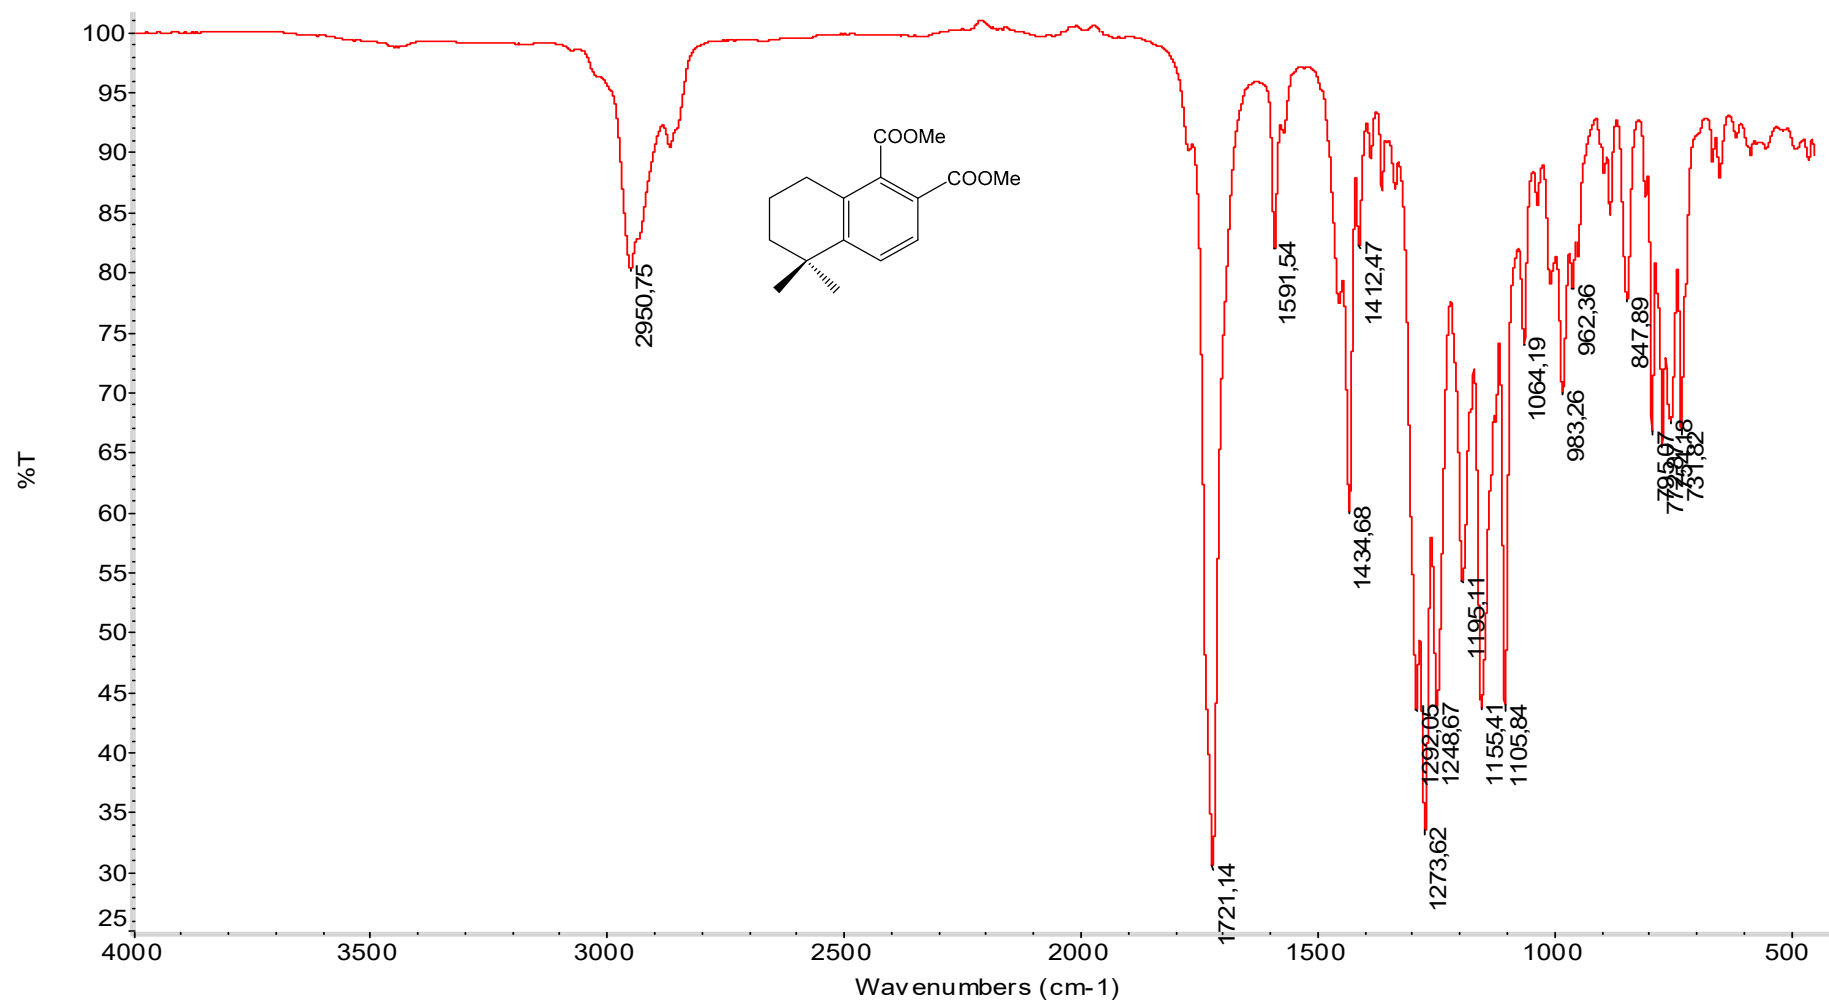

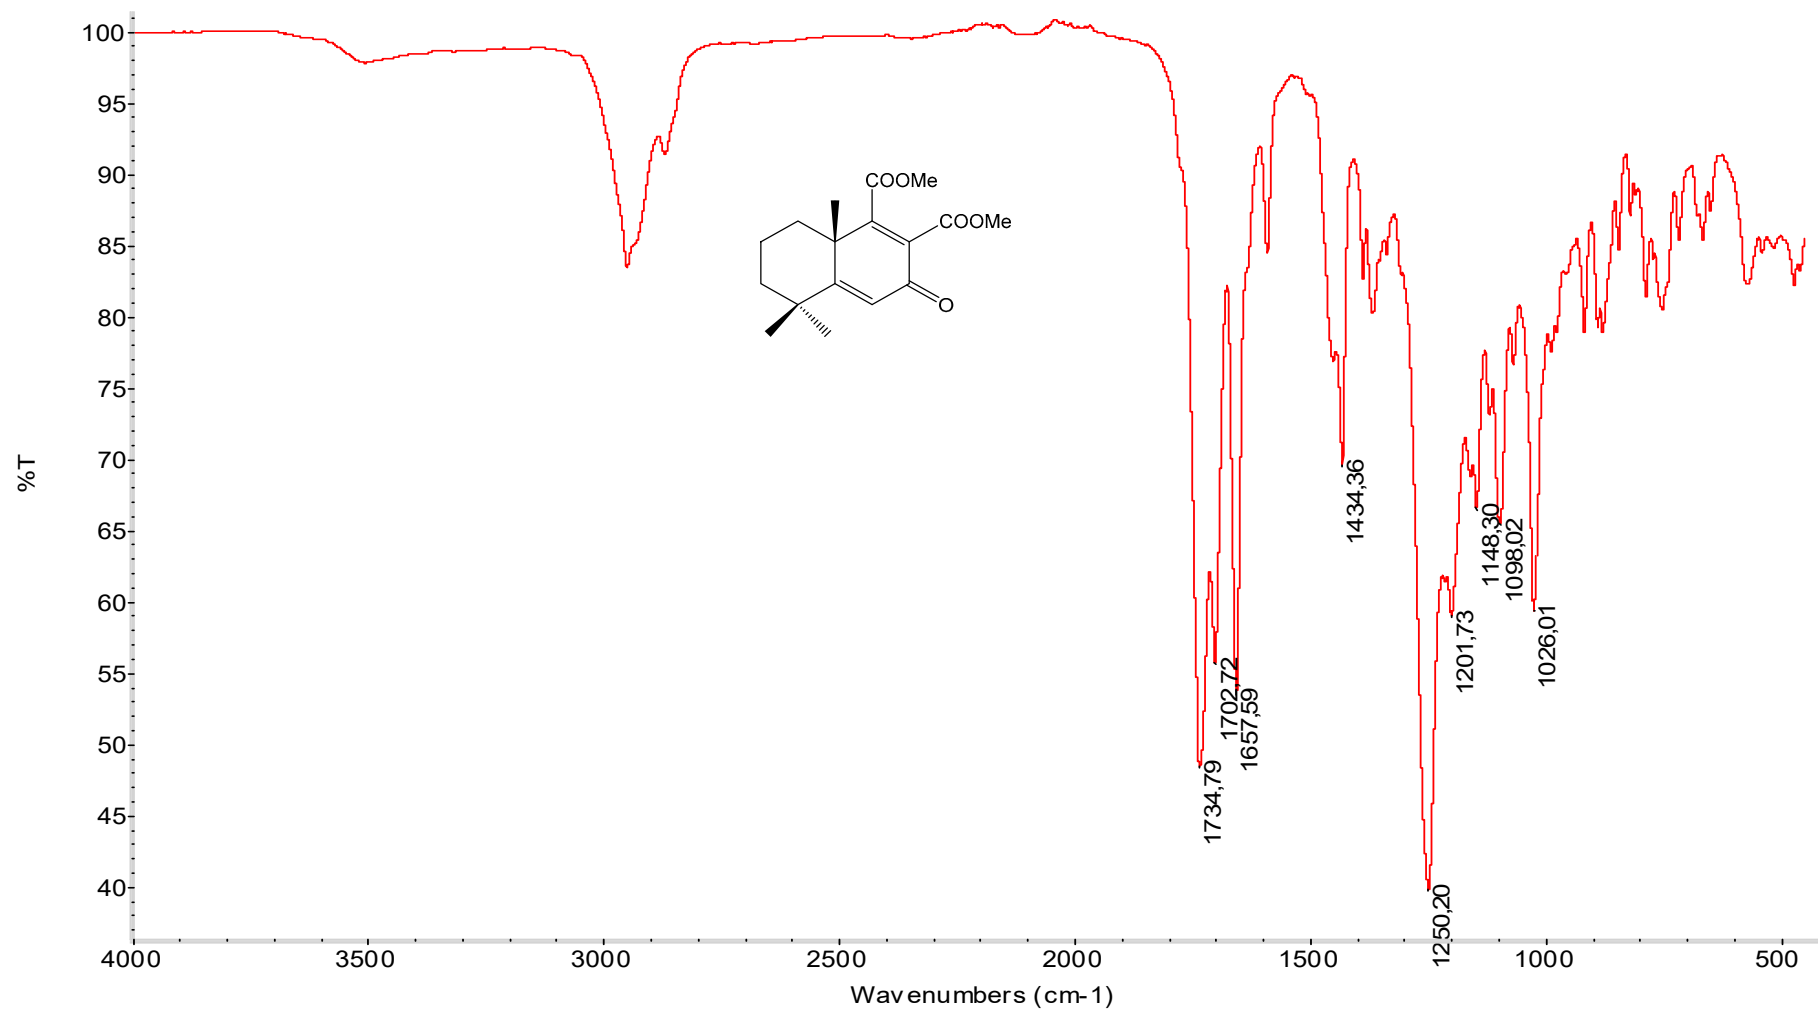

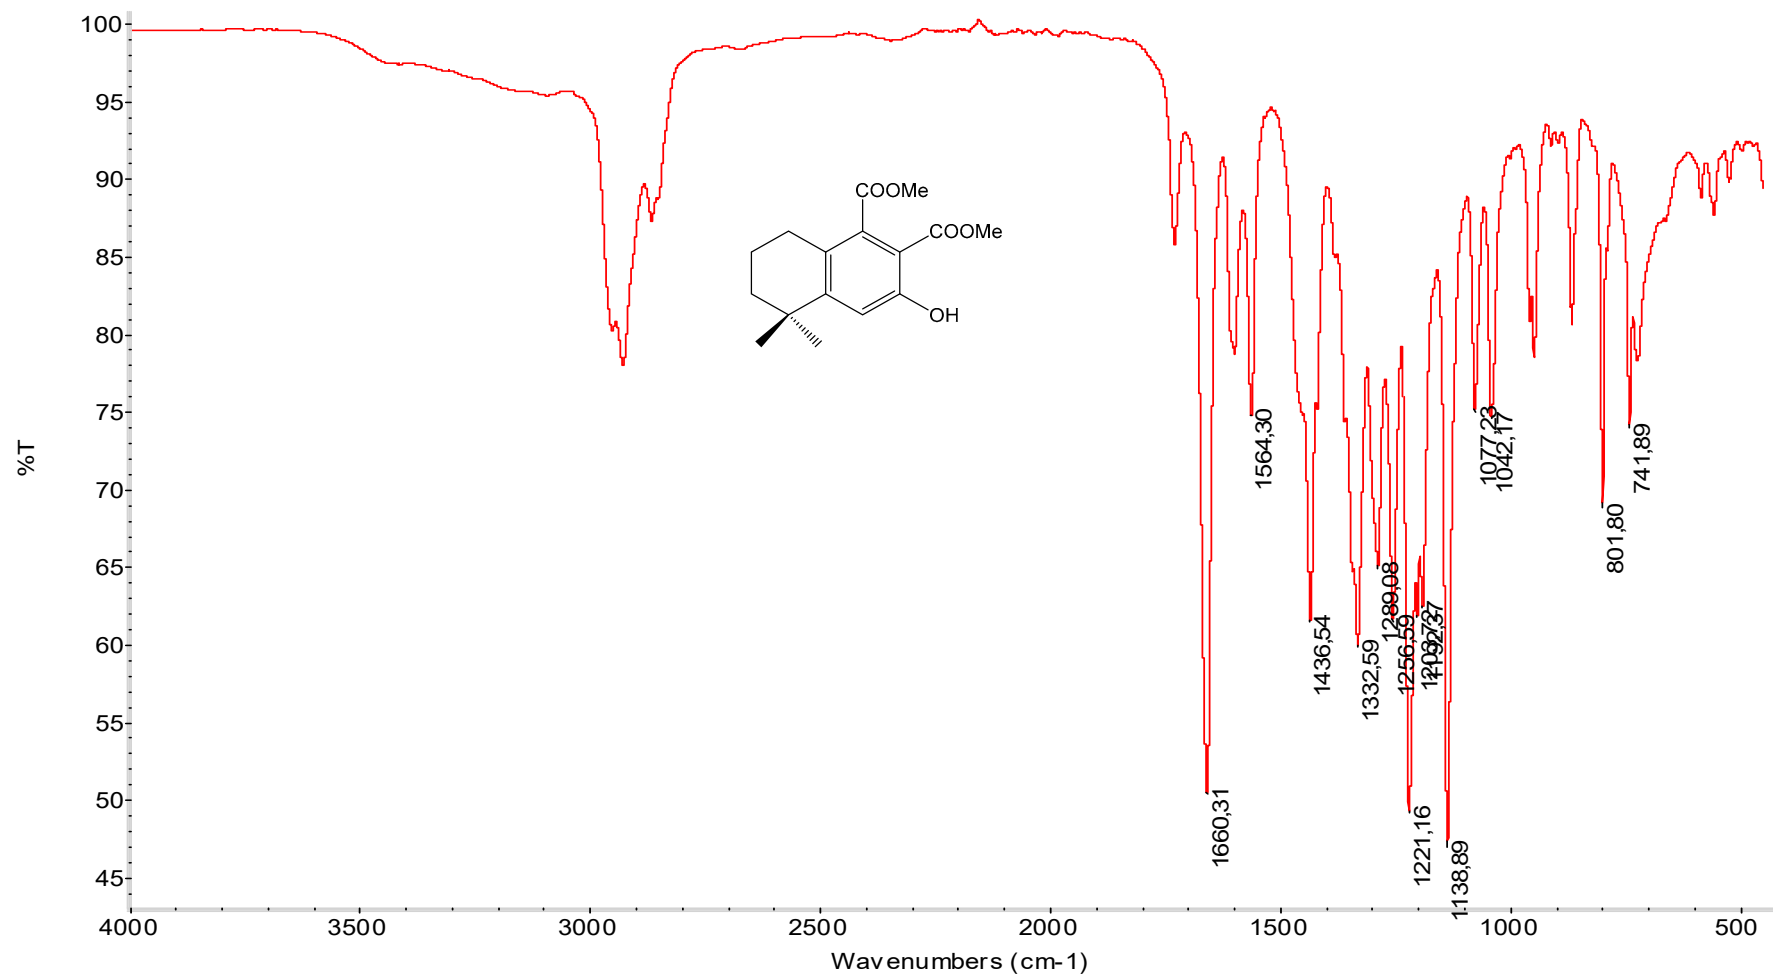

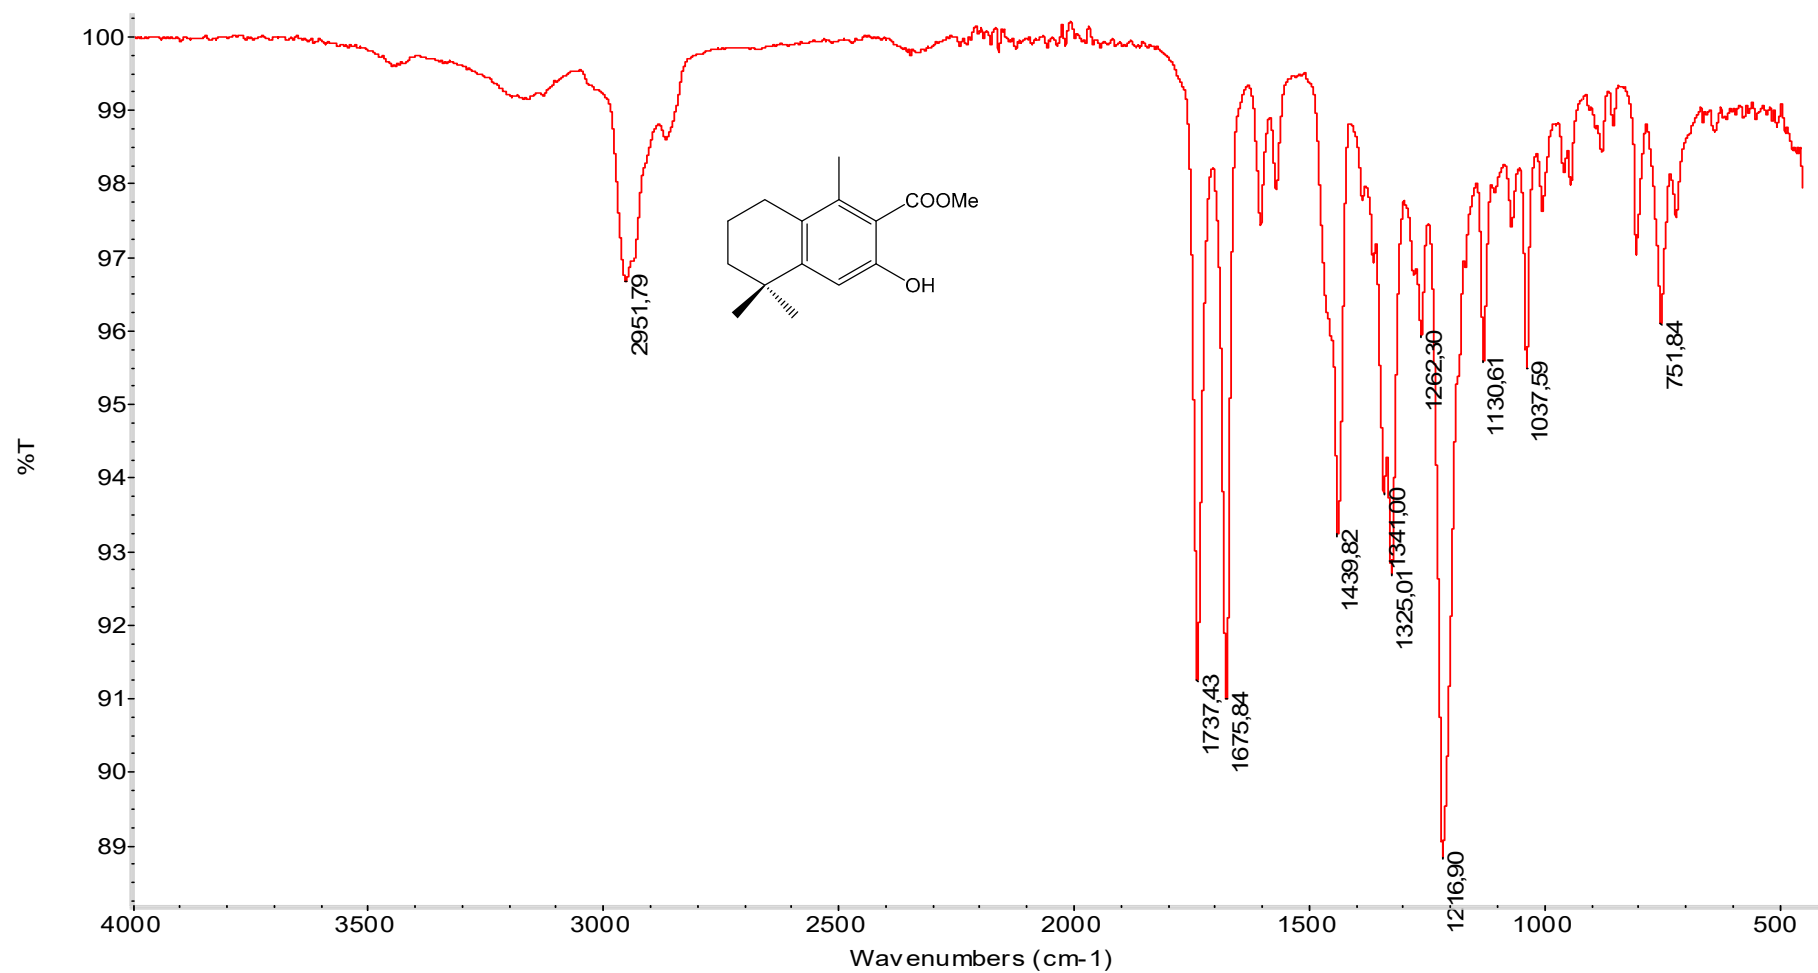

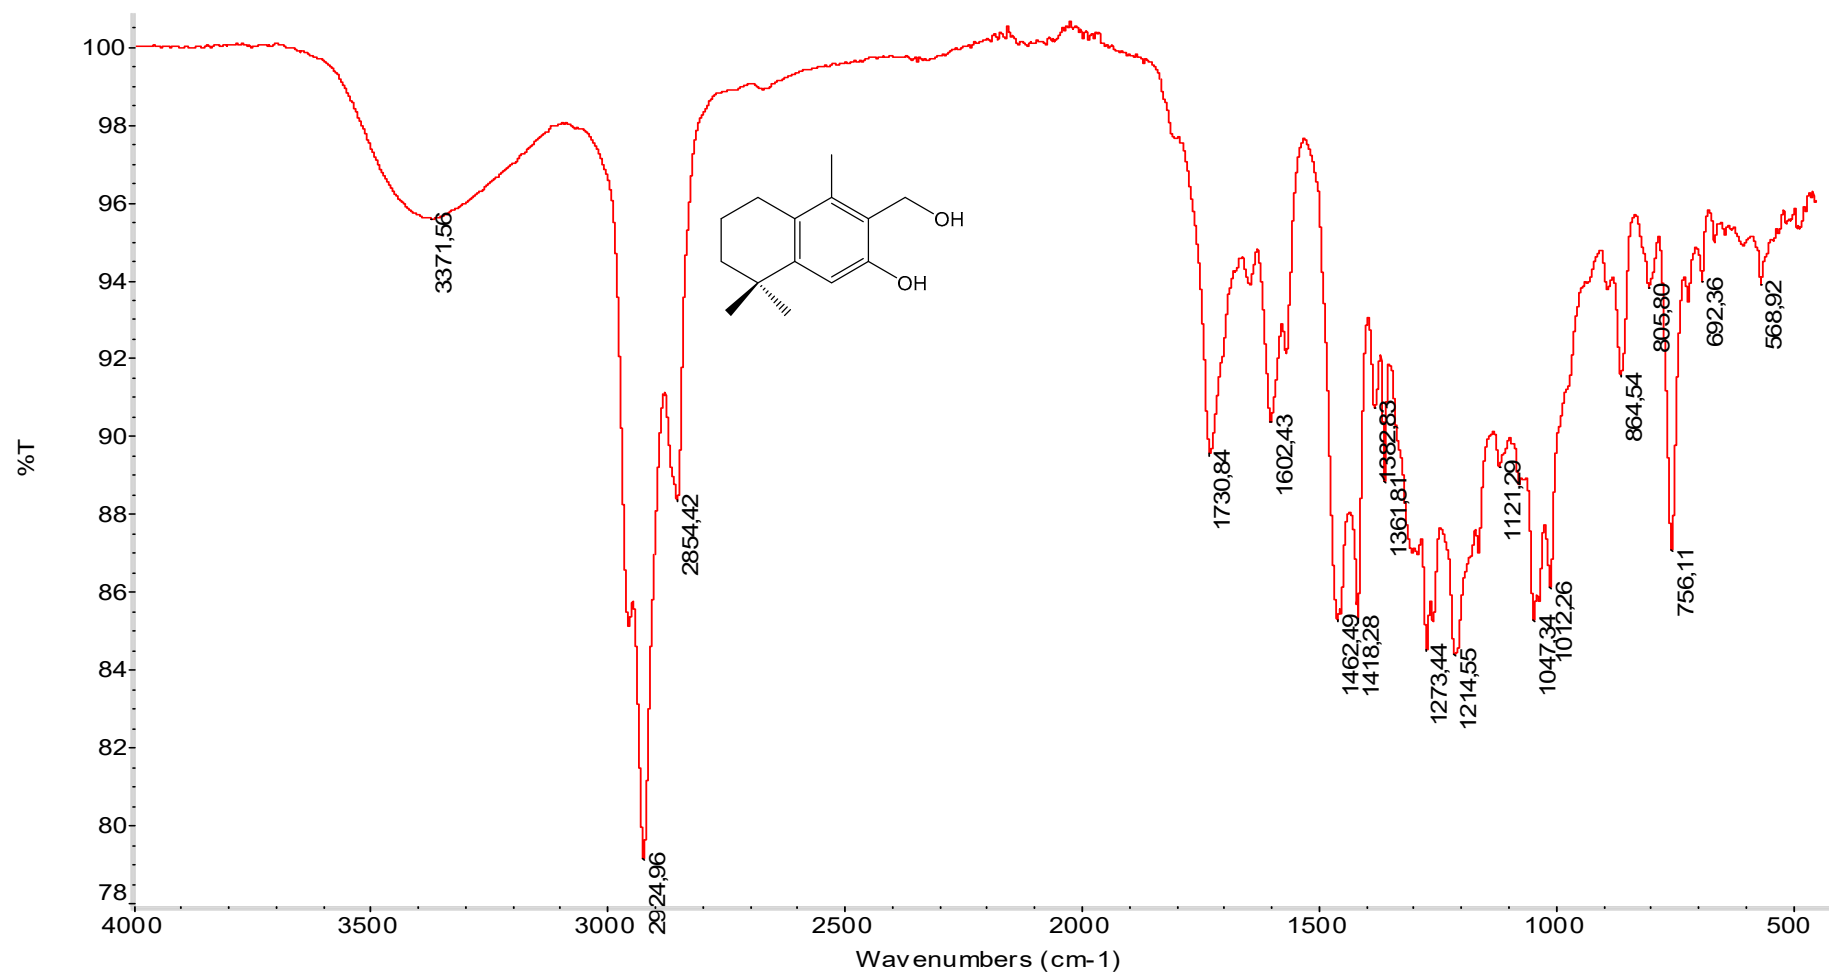



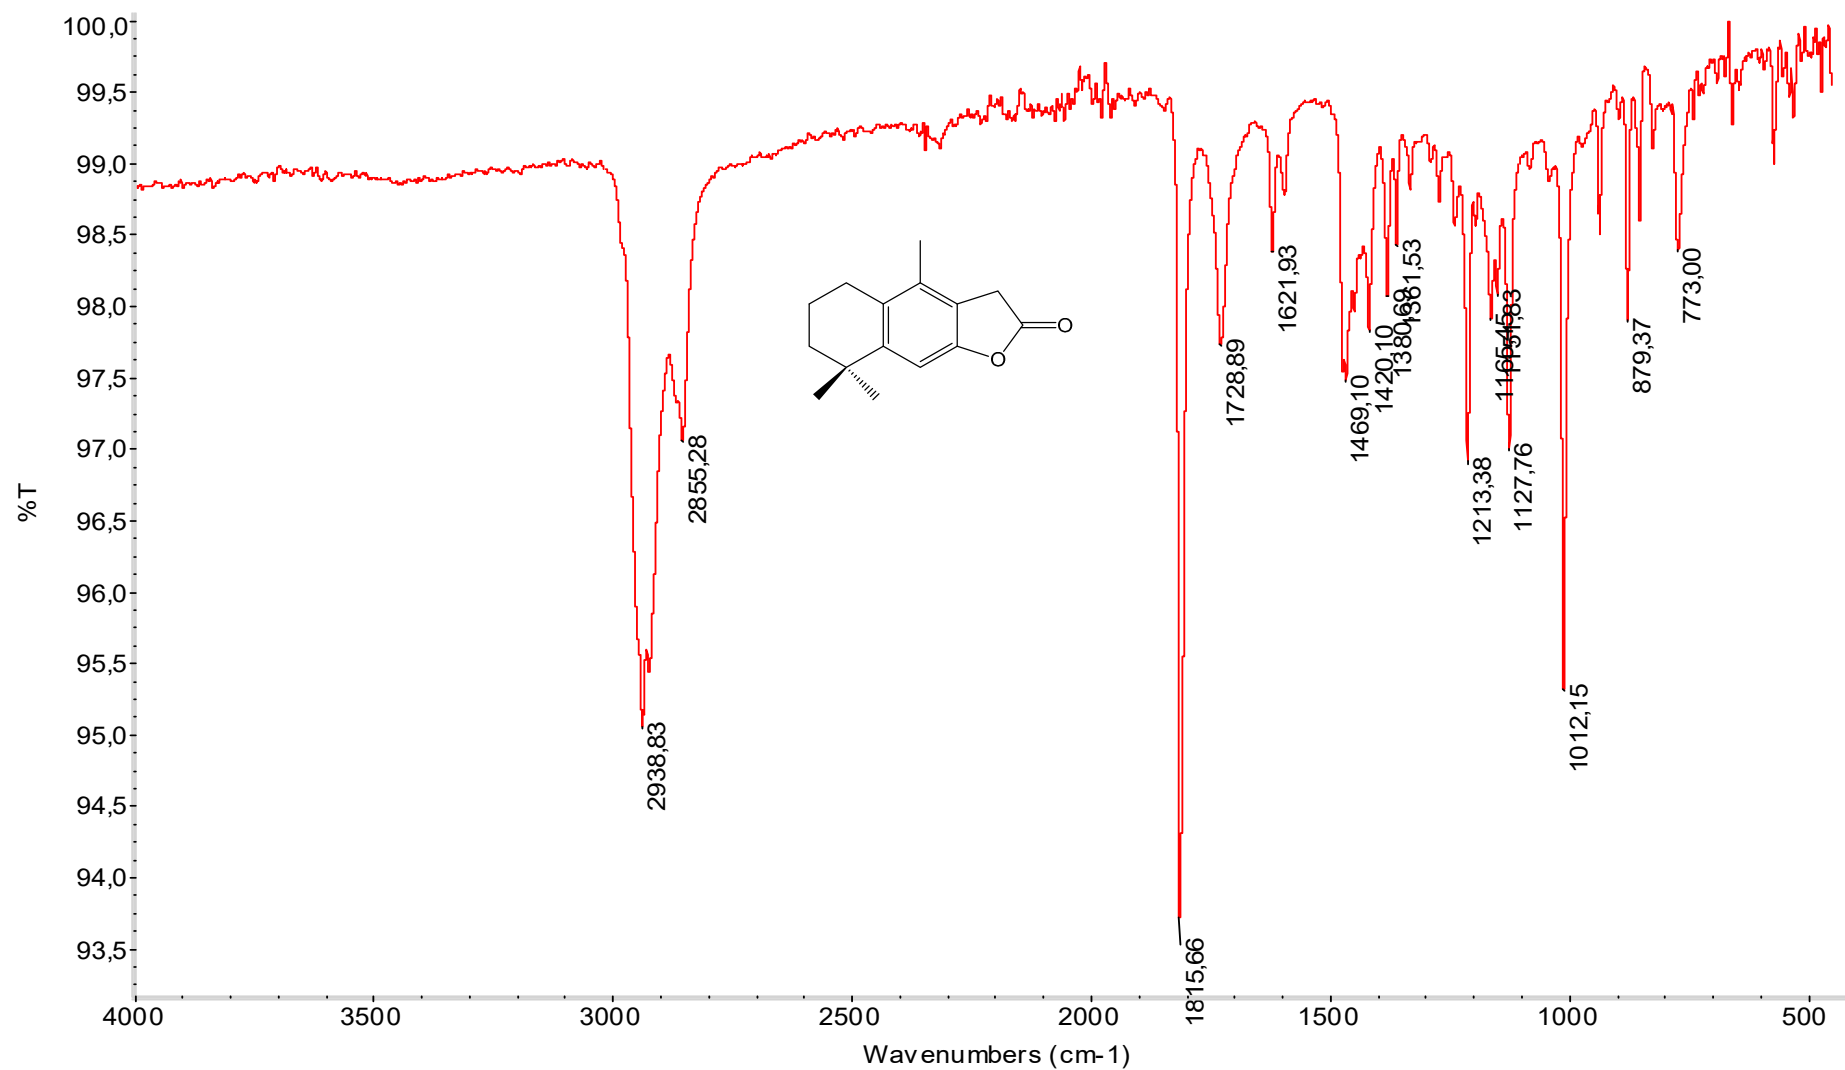

## HRMS spectra of compounds 12,13, 14, 15, and 16

### Elemental Composition Report

Page 1

#### Single Mass Analysis

Tolerance = 25.0 PPM / DBE: min = -20.0, max = 50.0

Element prediction: Off

Number of Isotope peaks used for I-FIT = 3

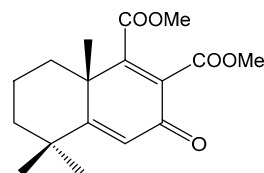

Monoisotopic Mass, Even Electron Ions

202 formula(e) evaluated with 5 results within limits (all results (up to 1000) for each mass)

Elements Used:

C: 0-50 H: 0-100 O: 0-25 <sup>23</sup>Na: 0-1

20\_12\_18 1 1264 (5.878)

1: TOF MS ES+  
7.08e+008

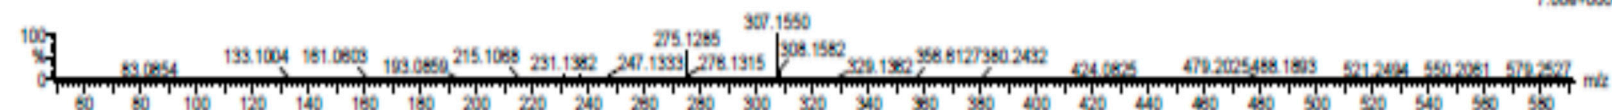

Minimum: -20.0  
Maximum: 20.0 25.0 50.0

| Mass     | Calc. Mass | mDa  | PPM   | DBE  | I-FIT | Norm  | Conf (%) | Formula                     |
|----------|------------|------|-------|------|-------|-------|----------|-----------------------------|
| 307.1550 | 307.1545   | 0.5  | 1.6   | 6.5  | 748.7 | 0.019 | 98.09    | C17 H23 O5                  |
|          | 307.1521   | 2.9  | 9.4   | 3.5  | 752.7 | 4.020 | 1.80     | C15 H24 O5 <sup>23</sup> Na |
|          | 307.1580   | -3.0 | -9.8  | -5.5 | 756.3 | 7.633 | 0.05     | C9 H28 O10 <sup>23</sup> Na |
|          | 307.1604   | -5.4 | -17.6 | -2.5 | 756.1 | 7.465 | 0.06     | C10 H27 O10                 |
|          | 307.1487   | 6.3  | 20.5  | 15.5 | 758.5 | 9.871 | 0.01     | C24 H19                     |

## Elemental Composition Report

Page 1

### Single Mass Analysis

Tolerance = 25.0 PPM / DBE: min = -20.0, max = 50.0

Element prediction: Off

Number of isotope peaks used for i-FIT = 3

Monoisotopic Mass, Even Electron Ions

145 formula(e) evaluated with 4 results within limits (all results (up to 1000) for each mass)

Elements Used:

C: 0-50 H: 0-100 O: 0-25 <sup>23</sup>Na: 0-1

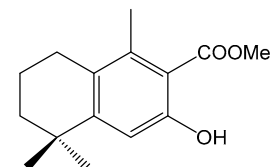

20\_12\_16 2 1538 (7.139)

1: TOF MS ES+  
3.87e+007

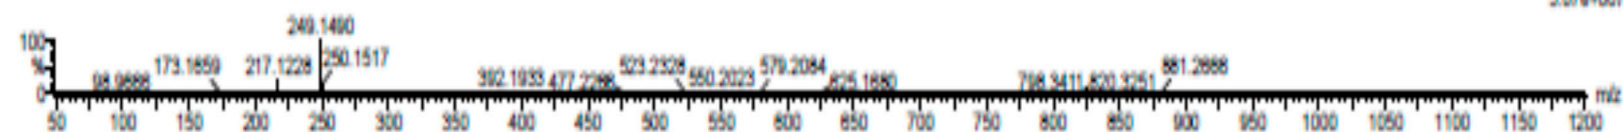

Minimum: -20.0

Maximum: 20.0 25.0 50.0

| Mass     | Calc. Mass | mDa  | PPM   | DBE  | i-FIT | Norm   | Conf (%) | Formula                     |
|----------|------------|------|-------|------|-------|--------|----------|-----------------------------|
| 249.1490 | 249.1491   | -0.1 | -0.4  | 5.5  | 968.6 | 0.005  | 99.48    | C15 H21 O1                  |
|          | 249.1467   | 2.3  | 9.2   | 2.5  | 973.9 | 5.260  | 0.52     | C13 H22 O3 <sup>23</sup> Na |
|          | 249.1525   | -3.5 | -14.0 | -6.5 | 982.3 | 13.653 | 0.00     | C6 H26 O8 <sup>23</sup> Na  |
|          | 249.1549   | -5.9 | -23.7 | -3.5 | 981.1 | 12.501 | 0.00     | C8 H25 O8                   |

## Elemental Composition Report

Page 1

### Single Mass Analysis

Tolerance = 25.0 PPM / DBE: min = -20.0, max = 50.0

Element prediction: Off

Number of isotope peaks used for i-FIT = 3

Monoisotopic Mass, Even Electron Ions

211 formula(e) evaluated with 7 results within limits (all results (up to 1000) for each mass)

Elements Used:

C: 0-50 H: 0-100 O: 0-25 Na: 0-1

20\_12\_16 4 REP 1492 (6.937)

1: TOF MS ES+  
3.30e+007

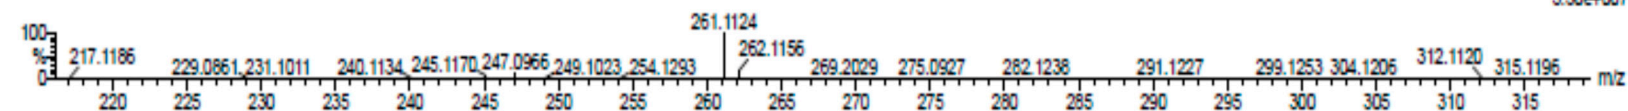

Minimum: -20.0  
Maximum: 20.0 25.0 50.0

| Mass     | Calc. Mass | mDa  | PPM   | DBE   | i-FIT | Norm   | Conf (%) | Formula       |
|----------|------------|------|-------|-------|-------|--------|----------|---------------|
| 315.1196 | 315.1197   | -0.1 | -0.3  | -12.5 | 685.7 | 12.835 | 0.00     | H27 O18       |
|          | 315.1208   | -1.2 | -3.8  | 6.5   | 673.3 | 0.405  | 66.69    | C16 H20 O5 Na |
|          | 315.1174   | 2.2  | 7.0   | 18.5  | 682.3 | 9.463  | 0.01     | C25 H15       |
|          | 315.1232   | -3.6 | -11.4 | 9.5   | 674.0 | 1.106  | 33.10    | C18 H19 O5    |
|          | 315.1150   | 4.6  | 14.6  | 15.5  | 681.5 | 8.656  | 0.02     | C23 H16 Na    |
|          | 315.1139   | 5.7  | 18.1  | -3.5  | 680.0 | 7.188  | 0.08     | C7 H23 O13    |
|          | 315.1267   | -7.1 | -22.5 | -2.5  | 679.7 | 6.824  | 0.11     | C9 H24 O10 Na |

## Elemental Composition Report

Page 1

### Single Mass Analysis

Tolerance = 25.0 PPM / DBE: min = -20.0, max = 50.0

Element prediction: Off

Number of isotope peaks used for I-FIT = 3

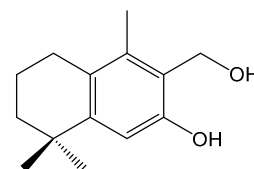

Monoisotopic Mass, Even Electron Ions

128 formula(e) evaluated with 3 results within limits (all results (up to 1000) for each mass)

Elements Used:

C: 0-50 H: 0-100 O: 0-25 Na: 0-1

20\_12\_18 5 2145 (9.975)

1: TOF MS ES+  
8.70e+006

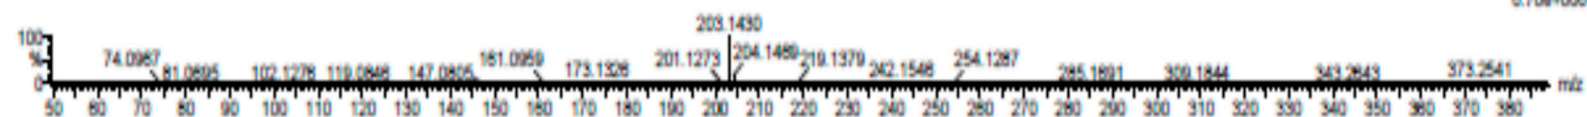

Minimum: -20.0

Maximum: 20.0 25.0 50.0

| Mass     | Calc. Mass | mDa  | PPM   | DBE  | I-FIT | Norm   | Conf(%) | Formula       |
|----------|------------|------|-------|------|-------|--------|---------|---------------|
| 219.1379 | 219.1385   | -0.6 | -2.7  | 5.5  | 387.9 | 0.003  | 99.68   | C14 H19 O2    |
|          | 219.1361   | 1.8  | 8.2   | 2.5  | 393.6 | 5.741  | 0.32    | C12 H20 O2 Na |
|          | 219.1420   | -4.1 | -18.7 | -6.5 | 404.5 | 16.651 | 0.00    | C5 H24 O7 Na  |

## Elemental Composition Report

Page 1

### Single Mass Analysis

Tolerance = 25.0 PPM / DBE: min = -20.0, max = 50.0

Element prediction: Off

Number of isotope peaks used for I-FIT = 3

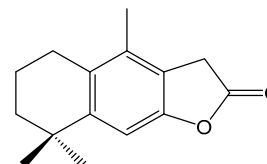

Monoisotopic Mass, Even Electron Ions

138 formula(e) evaluated with 3 results within limits (all results (up to 1000) for each mass)

Elements Used:

C: 0-50 H: 0-100 O: 0-25 Na: 0-1

20\_12\_18 7 1818 (7.506)

1: TOF MS ES+  
3.17e+006

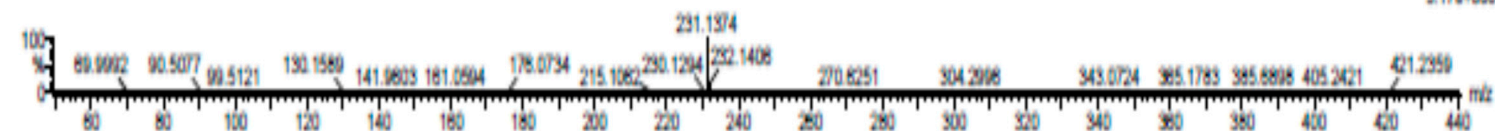

Minimum: -20.0

Maximum: 20.0 25.0 50.0

| Mass     | Calc. Mass | mDa  | PPM   | DBE  | I-FIT | Norm   | Conf (%) | Formula       |
|----------|------------|------|-------|------|-------|--------|----------|---------------|
| 231.1374 | 231.1385   | -1.1 | -4.8  | 6.5  | 664.1 | 0.003  | 99.70    | C15 H19 O2    |
|          | 231.1361   | 1.3  | 5.6   | 3.5  | 669.9 | 5.812  | 0.30     | C13 H20 O2 Na |
|          | 231.1420   | -4.6 | -19.9 | -5.5 | 680.4 | 16.324 | 0.00     | C6 H24 O7 Na  |
